# Supplementary material
Source: publisher figshare collection journal article supplement (https://acs.figshare.com/ndownloader/files/4770214)

# SUPPORTING INFORMATION

FOR

## General Strategy for the Syntheses of Corynanthe, Tacaman, and Oxindole Alkaloids

*Alexander Deiters,<sup>‡□</sup> Martin Pettersson, and Stephen F. Martin\**

*Department of Chemistry and Biochemistry  
The University of Texas at Austin, Austin, TX 78712*

*[sfmartin@mail.utexas.edu](mailto:sfmartin@mail.utexas.edu)*

### CONTENTS

|                                                        |    |
|--------------------------------------------------------|----|
| General Experimental Practices .....                   | S3 |
| <sup>1</sup> H NMR Spectrum of compound <b>4</b> ..... | S5 |
| <sup>1</sup> H NMR Spectrum of compound <b>5</b> ..... | S6 |

---

<sup>‡□</sup>Current address: Department of Chemistry, North Carolina State University, Raleigh, NC 27695-8204.

|                                                                                                                                                 |     |
|-------------------------------------------------------------------------------------------------------------------------------------------------|-----|
| <sup>1</sup> H NMR Spectrum of compound <b>6</b> .....                                                                                          | S7  |
| <sup>1</sup> H NMR Spectrum of compound <b>7</b> .....                                                                                          | S8  |
| <sup>1</sup> H NMR Spectrum of compound <b>8</b> .....                                                                                          | S9  |
| <sup>1</sup> H NMR Spectrum of compound <b>16</b> .....                                                                                         | S10 |
| <sup>1</sup> H NMR Spectrum of compound <b>17</b> .....                                                                                         | S11 |
| <sup>1</sup> H NMR Spectrum of compound <b>18</b> .....                                                                                         | S12 |
| <sup>1</sup> H NMR Spectrum of compound <b>19</b> .....                                                                                         | S13 |
| <sup>1</sup> H NMR Spectrum of compound <b>20</b> .....                                                                                         | S14 |
| <sup>1</sup> H NMR Spectrum of compound <b>22</b> .....                                                                                         | S15 |
| <sup>1</sup> H NMR Spectrum of compound <b>23</b> .....                                                                                         | S16 |
| <sup>1</sup> H NMR Spectrum of compound <b>26</b> .....                                                                                         | S17 |
| <sup>1</sup> H NMR Spectrum of compound <b>epi-26</b> .....                                                                                     | S18 |
| <sup>1</sup> H NMR Spectrum of compound <b>33</b> .....                                                                                         | S19 |
| <sup>1</sup> H NMR Spectrum of compound <b>35</b> .....                                                                                         | S20 |
| <sup>1</sup> H NMR Spectrum of 2-(4-Oxo-1,2,3,4,6,7,12,12b-octahydroindolo[2,3- <i>a</i> ]quinolizin-<br>2-yl)malonic acid dimethyl ester ..... | S21 |
| <sup>1</sup> H NMR Spectrum of compound <b>36</b> .....                                                                                         | S22 |
| <sup>1</sup> H NMR Spectrum of compound <b>37</b> .....                                                                                         | S23 |
| <sup>1</sup> H NMR Spectrum of compound <b>38</b> .....                                                                                         | S24 |
| <sup>1</sup> H NMR Spectrum of compound <b>39</b> .....                                                                                         | S25 |
| <sup>1</sup> H NMR Spectrum of compound <b>40</b> .....                                                                                         | S26 |

|                                                                                                                   |     |
|-------------------------------------------------------------------------------------------------------------------|-----|
| <sup>1</sup> H NMR Spectrum of compound <b>41</b> .....                                                           | S27 |
| <sup>1</sup> H NMR Spectrum of compound 1-(1-Allyl-1,3,4,9-tetrahydro-β-carbolin-2-yl)-<br>2-ethylpropenone ..... | S28 |
| <sup>1</sup> H NMR Spectrum of compound <b>43</b> .....                                                           | S29 |
| <sup>1</sup> H NMR Spectrum of compound <b>44</b> .....                                                           | S30 |
| <sup>1</sup> H NMR Spectrum of compound <b>45</b> .....                                                           | S31 |
| <sup>1</sup> H NMR Spectrum of compound <b>46</b> .....                                                           | S32 |
| <sup>1</sup> H NMR Spectrum of compound <b>47</b> .....                                                           | S33 |
| ORTEP of compound <b>26</b> .....                                                                                 | S34 |
| ORTEP of compound <b>44</b> .....                                                                                 | S35 |

## Experimental Section

**General Methods.** Unless otherwise noted, solvents and reagents were reagent grade and used without purification. CH<sub>2</sub>Cl<sub>2</sub>, *i*-Pr<sub>2</sub>NH and Et<sub>3</sub>N were freshly distilled from CaH<sub>2</sub>. THF and Et<sub>2</sub>O were passed through two columns of neutral alumina. MeOH, CH<sub>3</sub>CN and DMF were passed through two columns of molecular sieves. Toluene was passed through a column of neutral alumina and a column of Q5 reactant. Reactions involving air- or moisture-sensitive reagents or intermediates were performed under an inert atmosphere of argon in glassware that had been flame dried. Melting points are uncorrected. Infrared (IR) spectra were recorded either neat on sodium chloride plates or as solutions in CH<sub>2</sub>Cl<sub>2</sub> as indicated and are reported in wavenumbers (cm<sup>-1</sup>). <sup>1</sup>H and <sup>13</sup>C NMR spectra were obtained as solutions in CDCl<sub>3</sub> or C<sub>6</sub>D<sub>6</sub> and chemical shifts are reported in parts per million (ppm) downfield

from (CH<sub>3</sub>)<sub>4</sub>Si (TMS). Coupling constants are reported in hertz (Hz). Spectral splitting patterns are designated as follows: s, singlet; br, broad; d, doublet; t, triplet; q, quartet; quin, quintet; m, multiplet and comp, complex multiplet. Flash column-chromatography was performed using Merck silica gel 60 (230-400 mesh ASTM) according to Still.<sup>1</sup> When specified in the experimental procedures, solvents were degassed immediately prior to use for reactions that were particularly oxygen sensitive. CH<sub>2</sub>Cl<sub>2</sub> used in metathesis reactions was degassed by passing argon through the solvent for 20 min. THF, toluene and MeOH were degassed using the “freeze-pump-thaw” method: A flame-dried two-neck flask equipped with argon and vacuum inlet was charged with the appropriate solvent. The flask was cooled with liquid nitrogen and evacuated. After the solvent had solidified, the liquid nitrogen bath was removed, and while still under vacuum, the flask was gently warmed with a heat gun to melt the solvent. When all the solvent had melted, the flask was again immersed in liquid nitrogen and the process was repeated two more times. After the solvent had melted the third time the vacuum inlet was closed off and the flask was backfilled with argon. Under a stream of argon the vacuum adapter was replaced with a septum and the solvent was immediately used in the reaction.

---

1. Still, W. C.; Kahn, M.; Mitra, A. *J. Org. Chem.* **1978**, *43*, 2923.

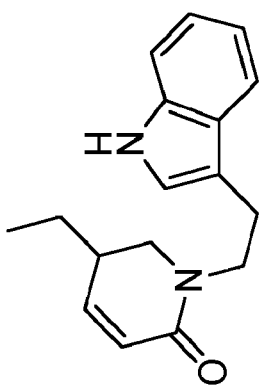

**4**

(300 MHz, CDCl<sub>3</sub>)

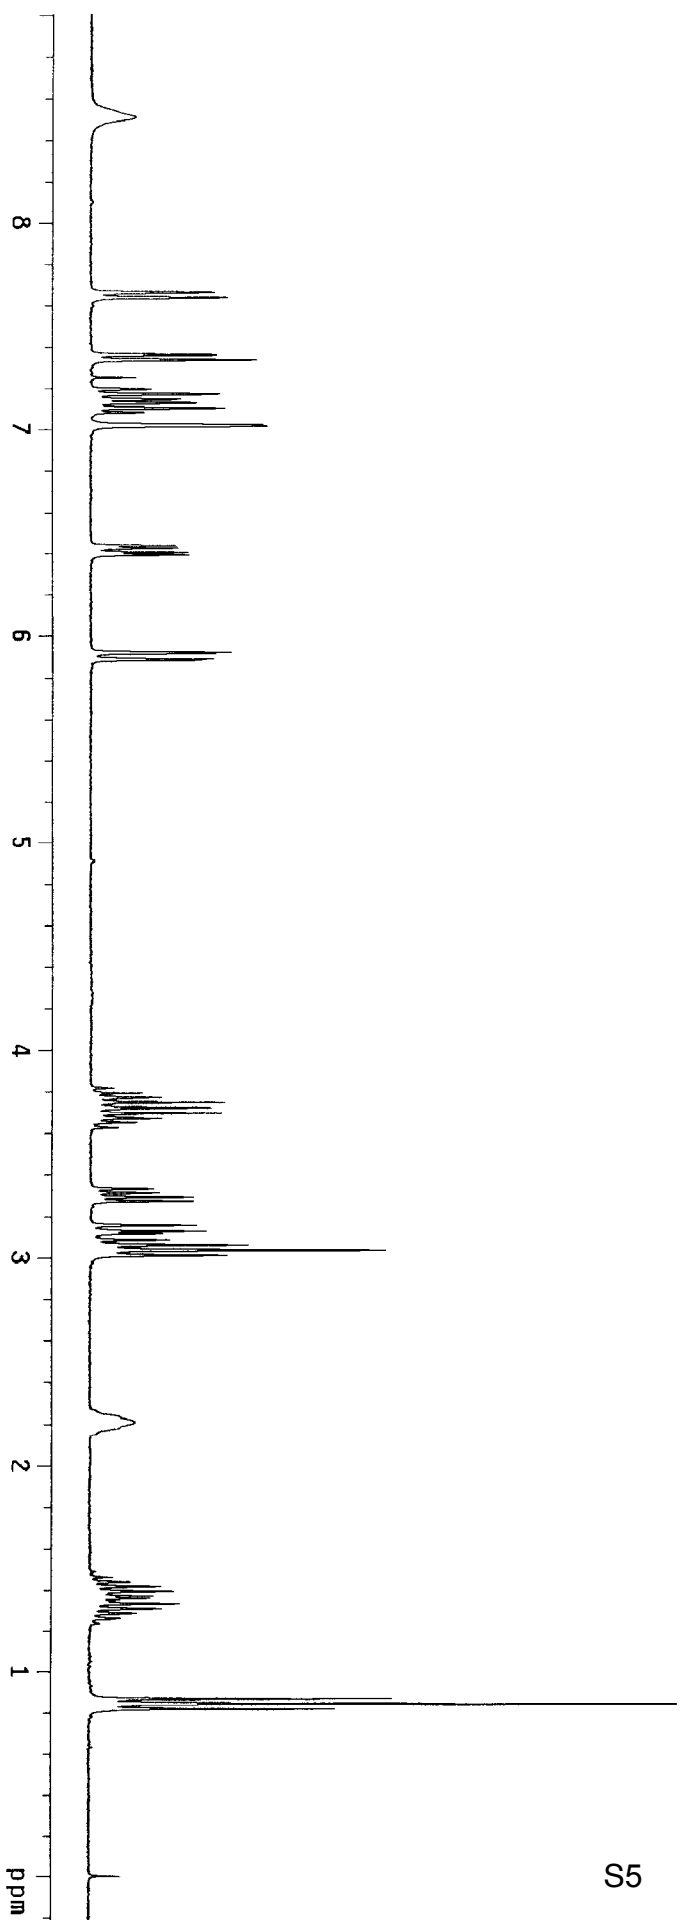

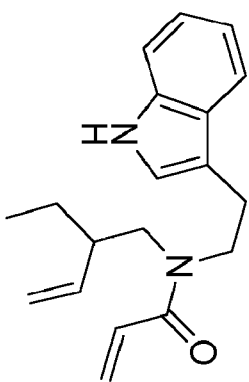

**5**

(300 MHz, CDCl<sub>3</sub>)

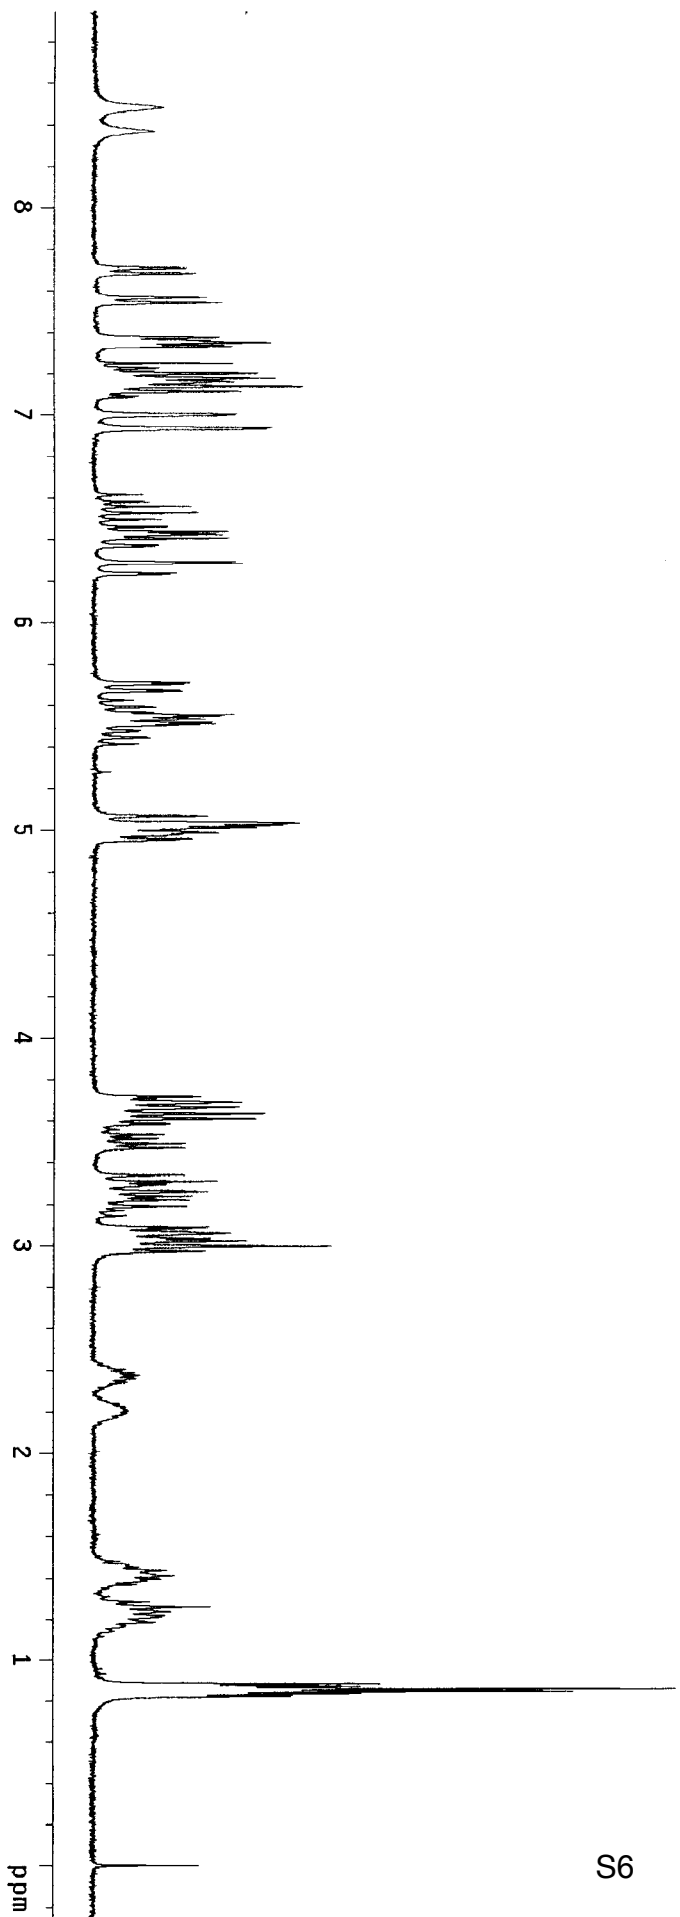

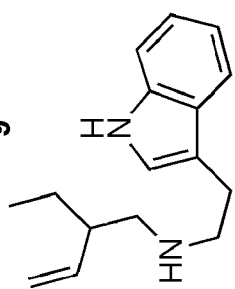

**6**

(300 MHz, CD<sub>3</sub>Cl)

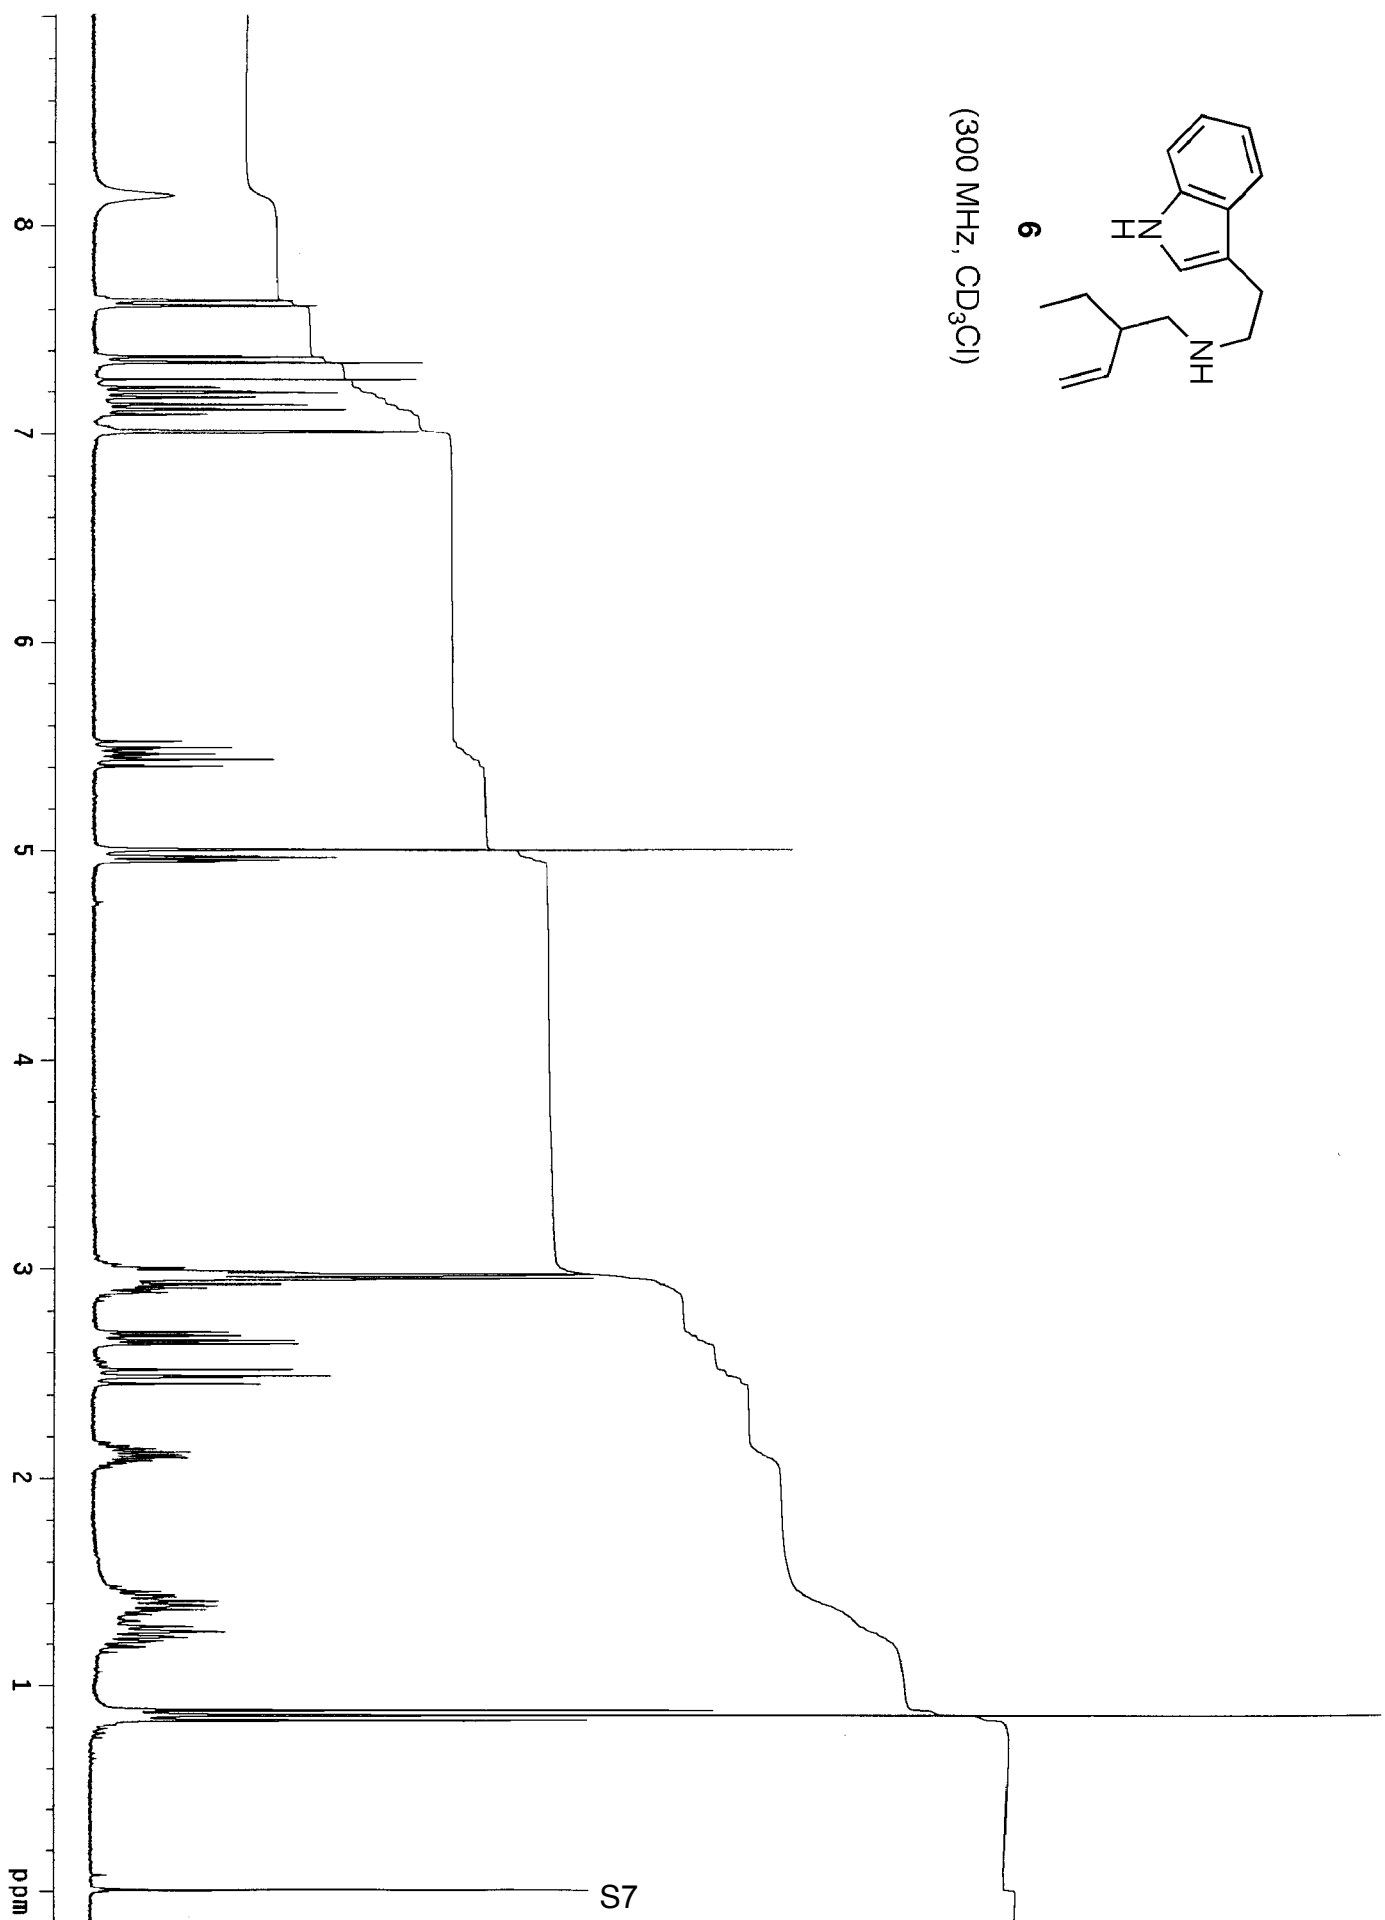

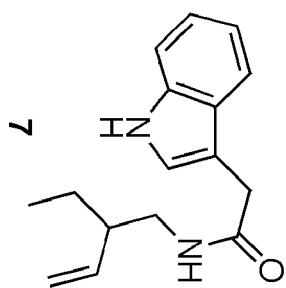

(300 MHz, CD<sub>3</sub>Cl)

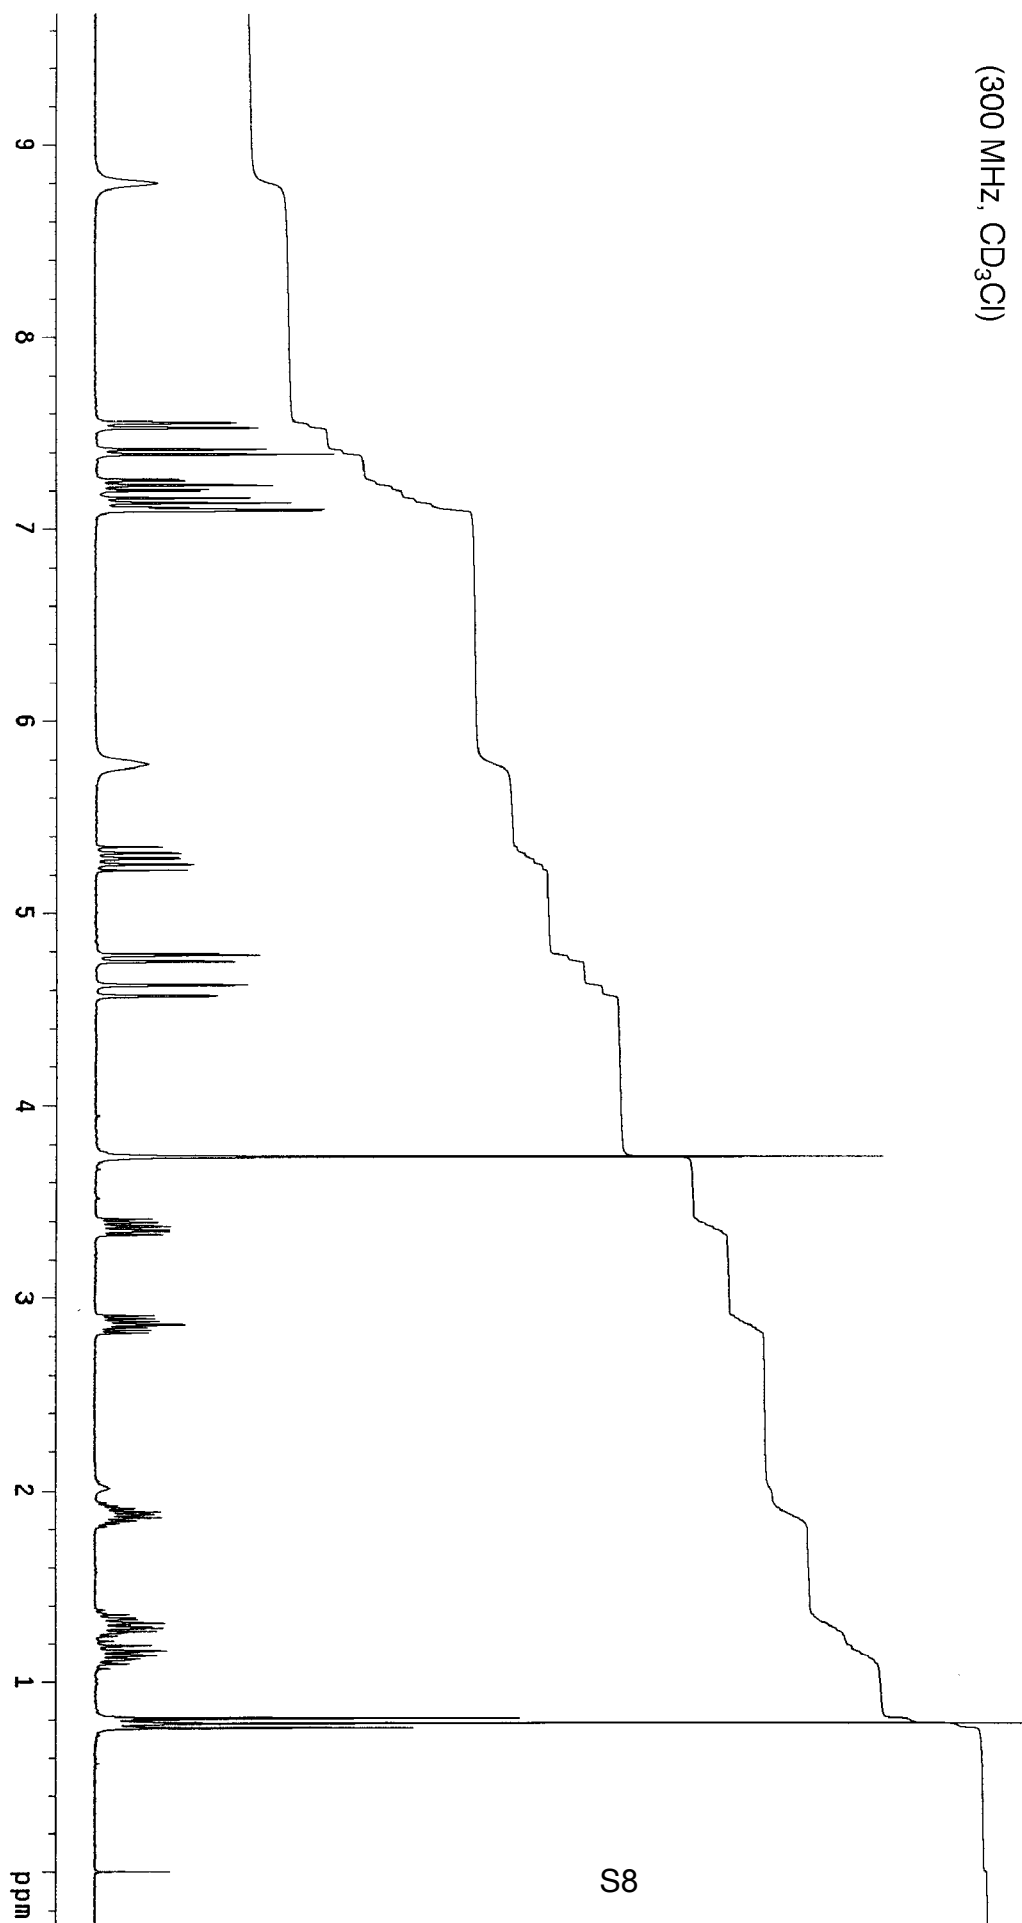



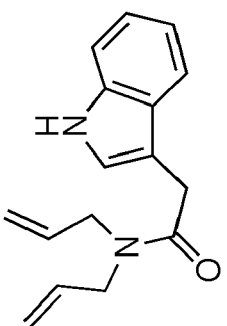

**8**

(300 MHz, CD<sub>3</sub>Cl)

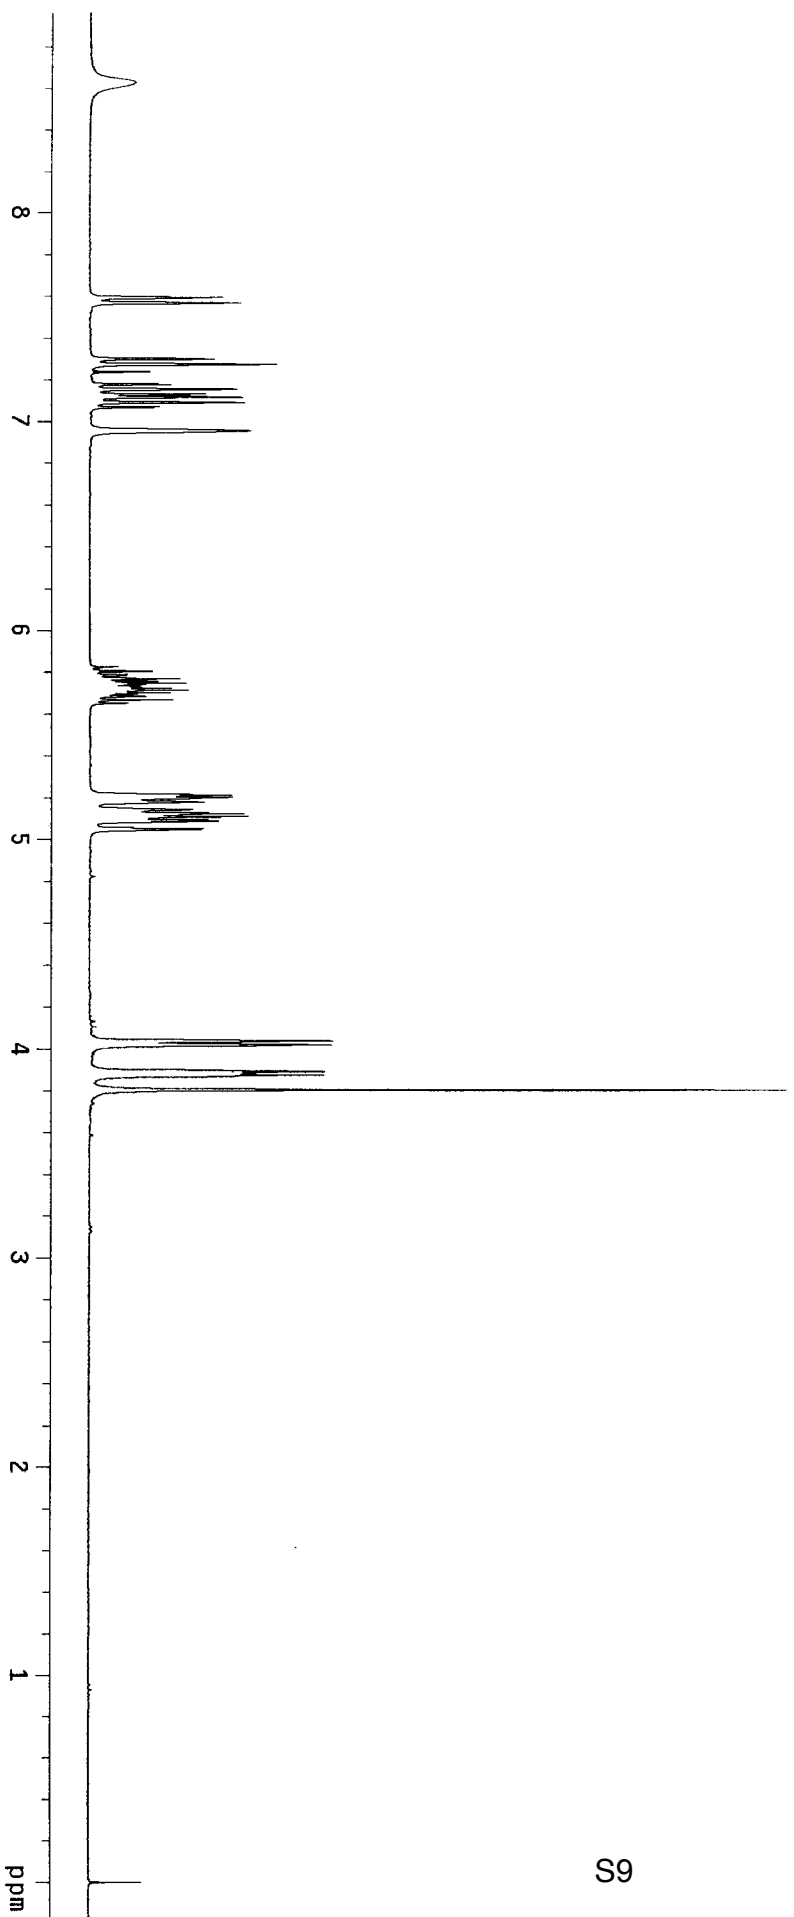

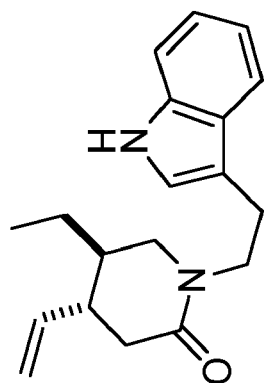

**16**

(300 MHz, CDCl<sub>3</sub>)

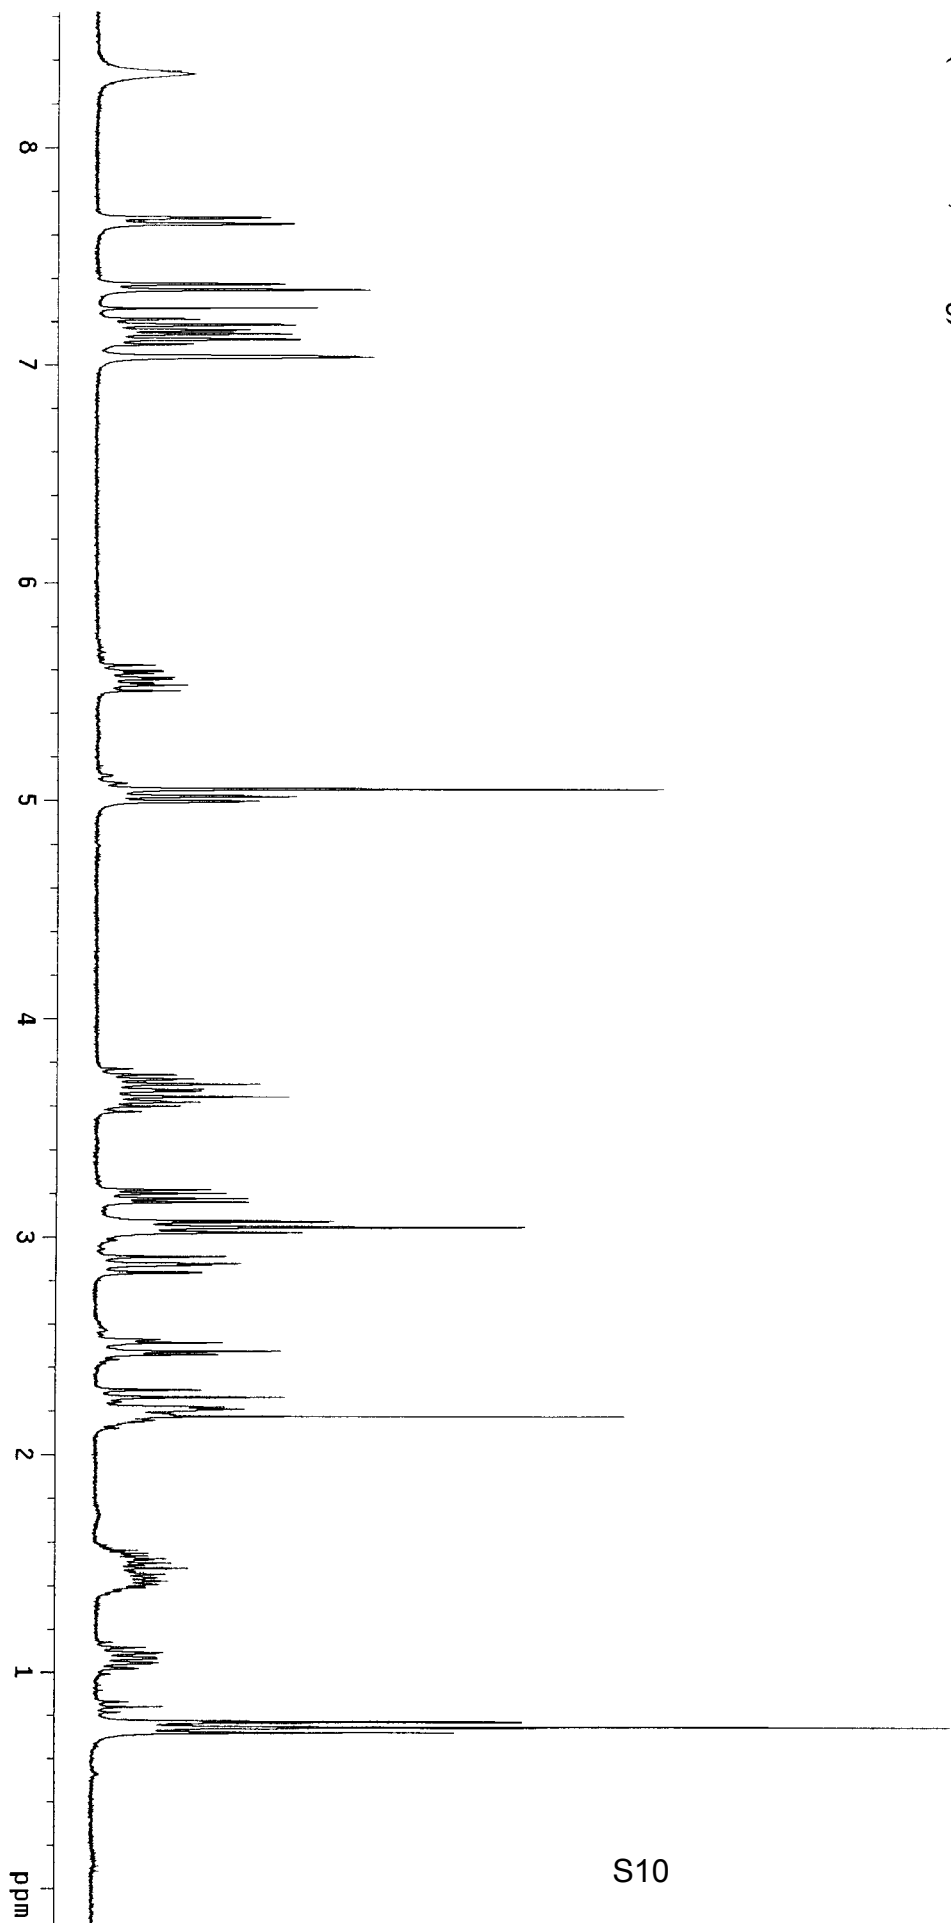

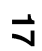(300 MHz, CDCl<sub>3</sub>)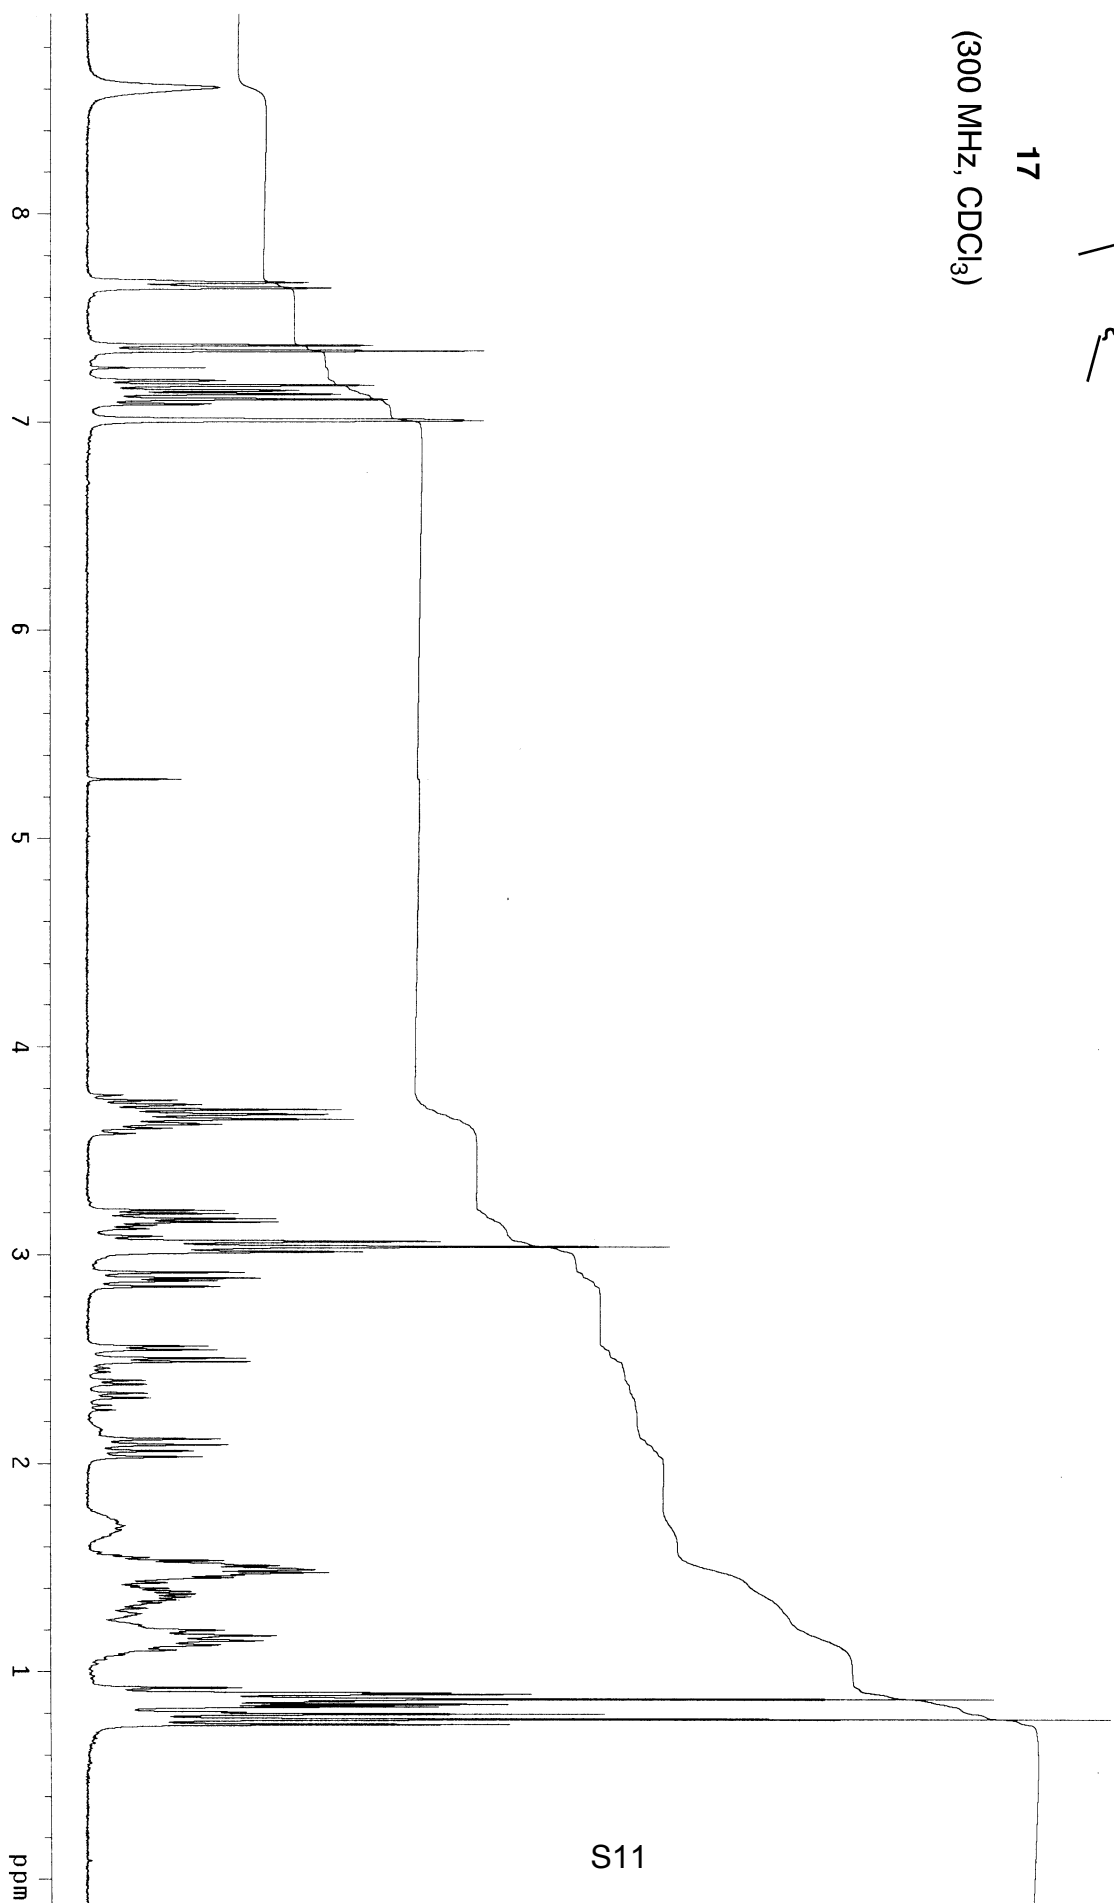

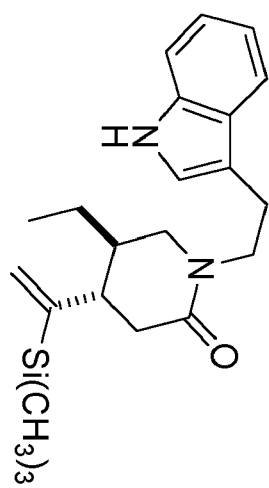

**18**

(400 MHz, CDCl<sub>3</sub>)

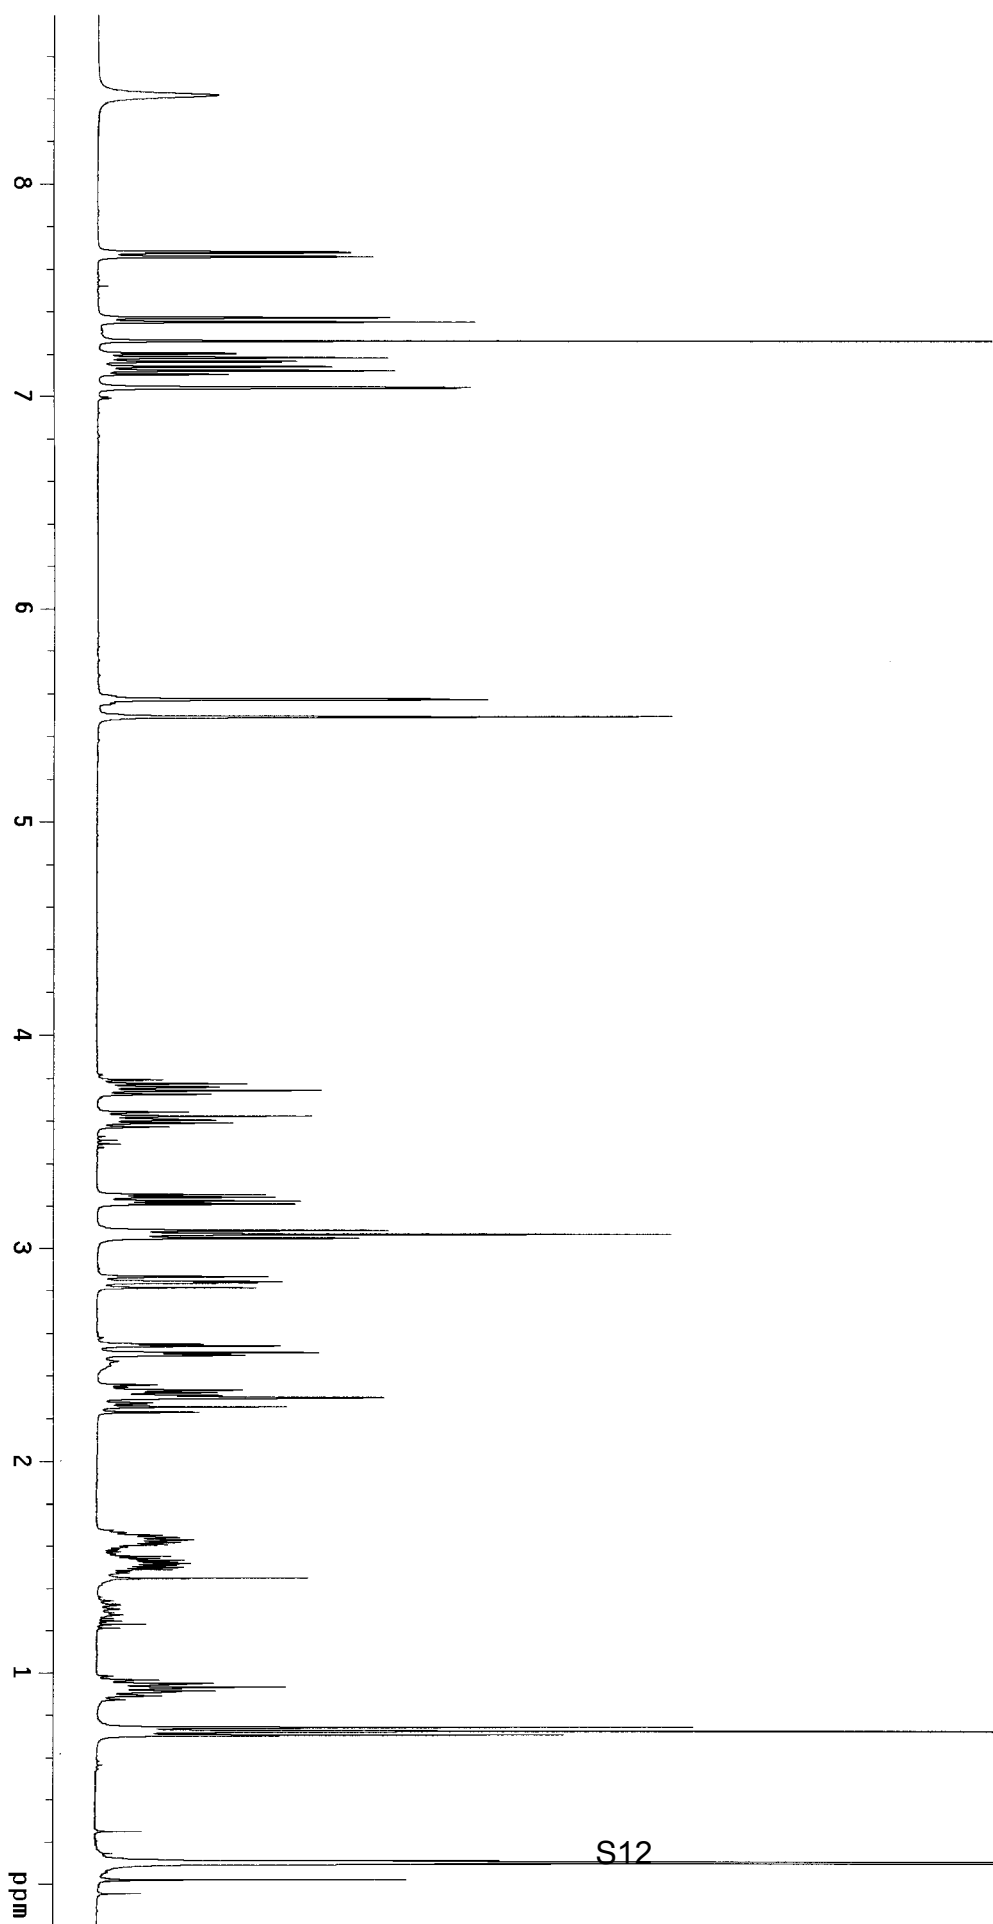

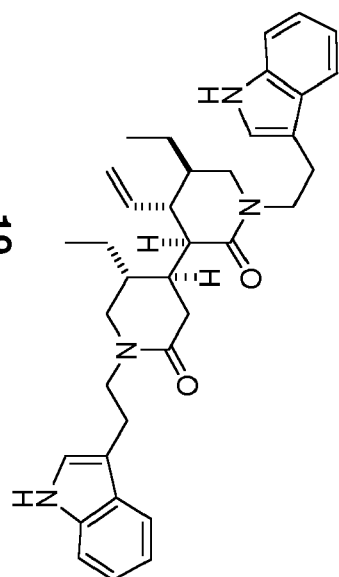

**19**

(400 MHz, CDCl<sub>3</sub>)

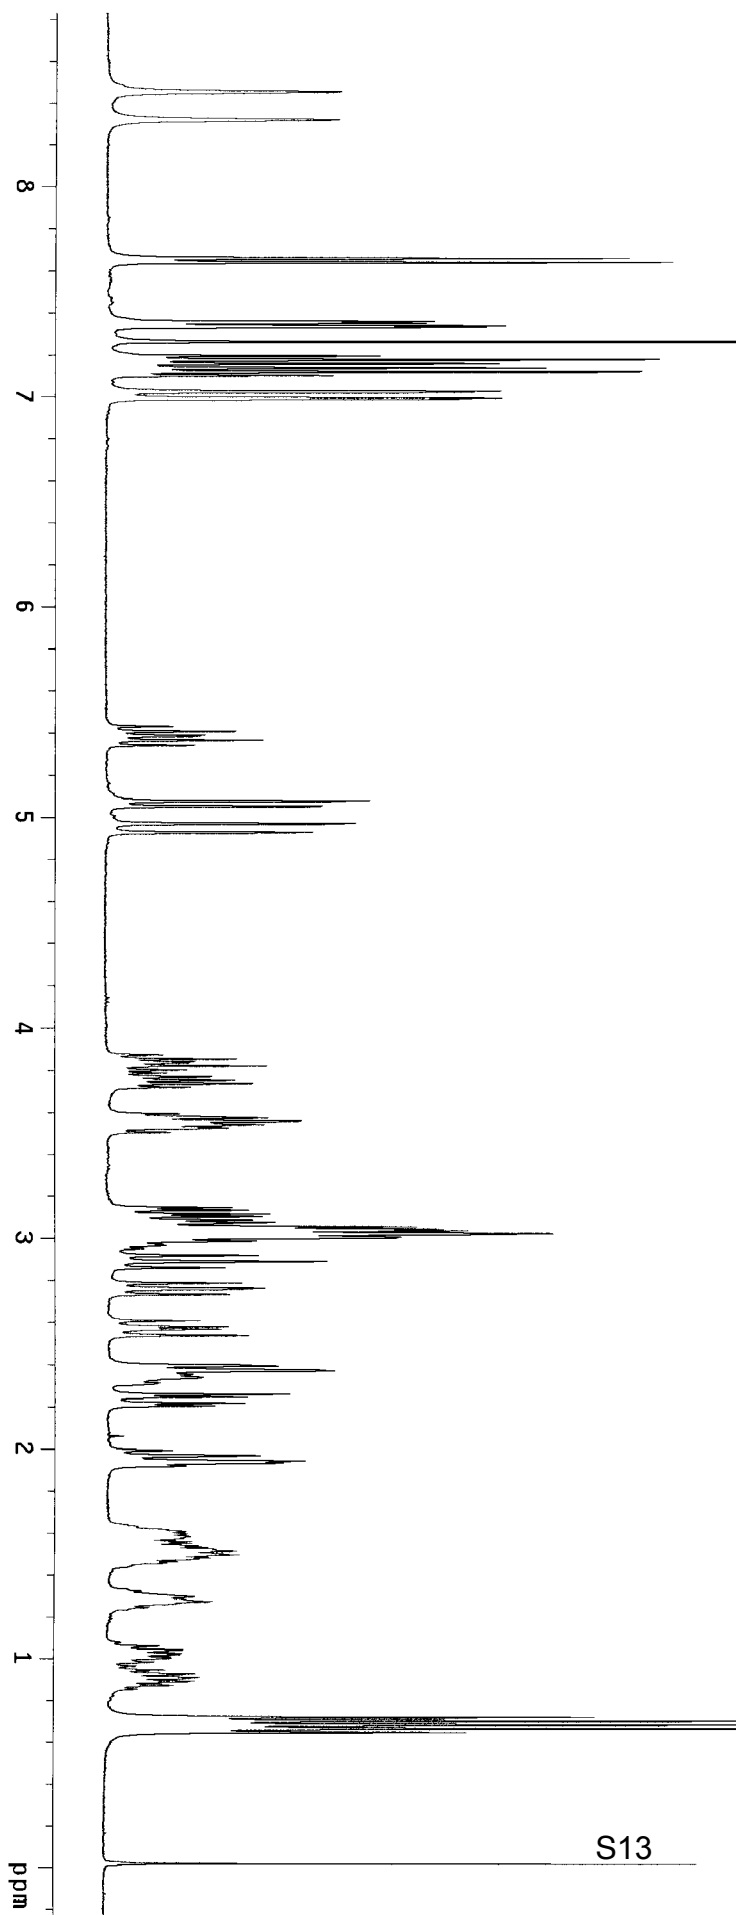

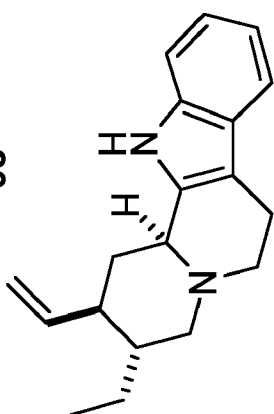

**20**

(300 MHz, CDCl<sub>3</sub>)

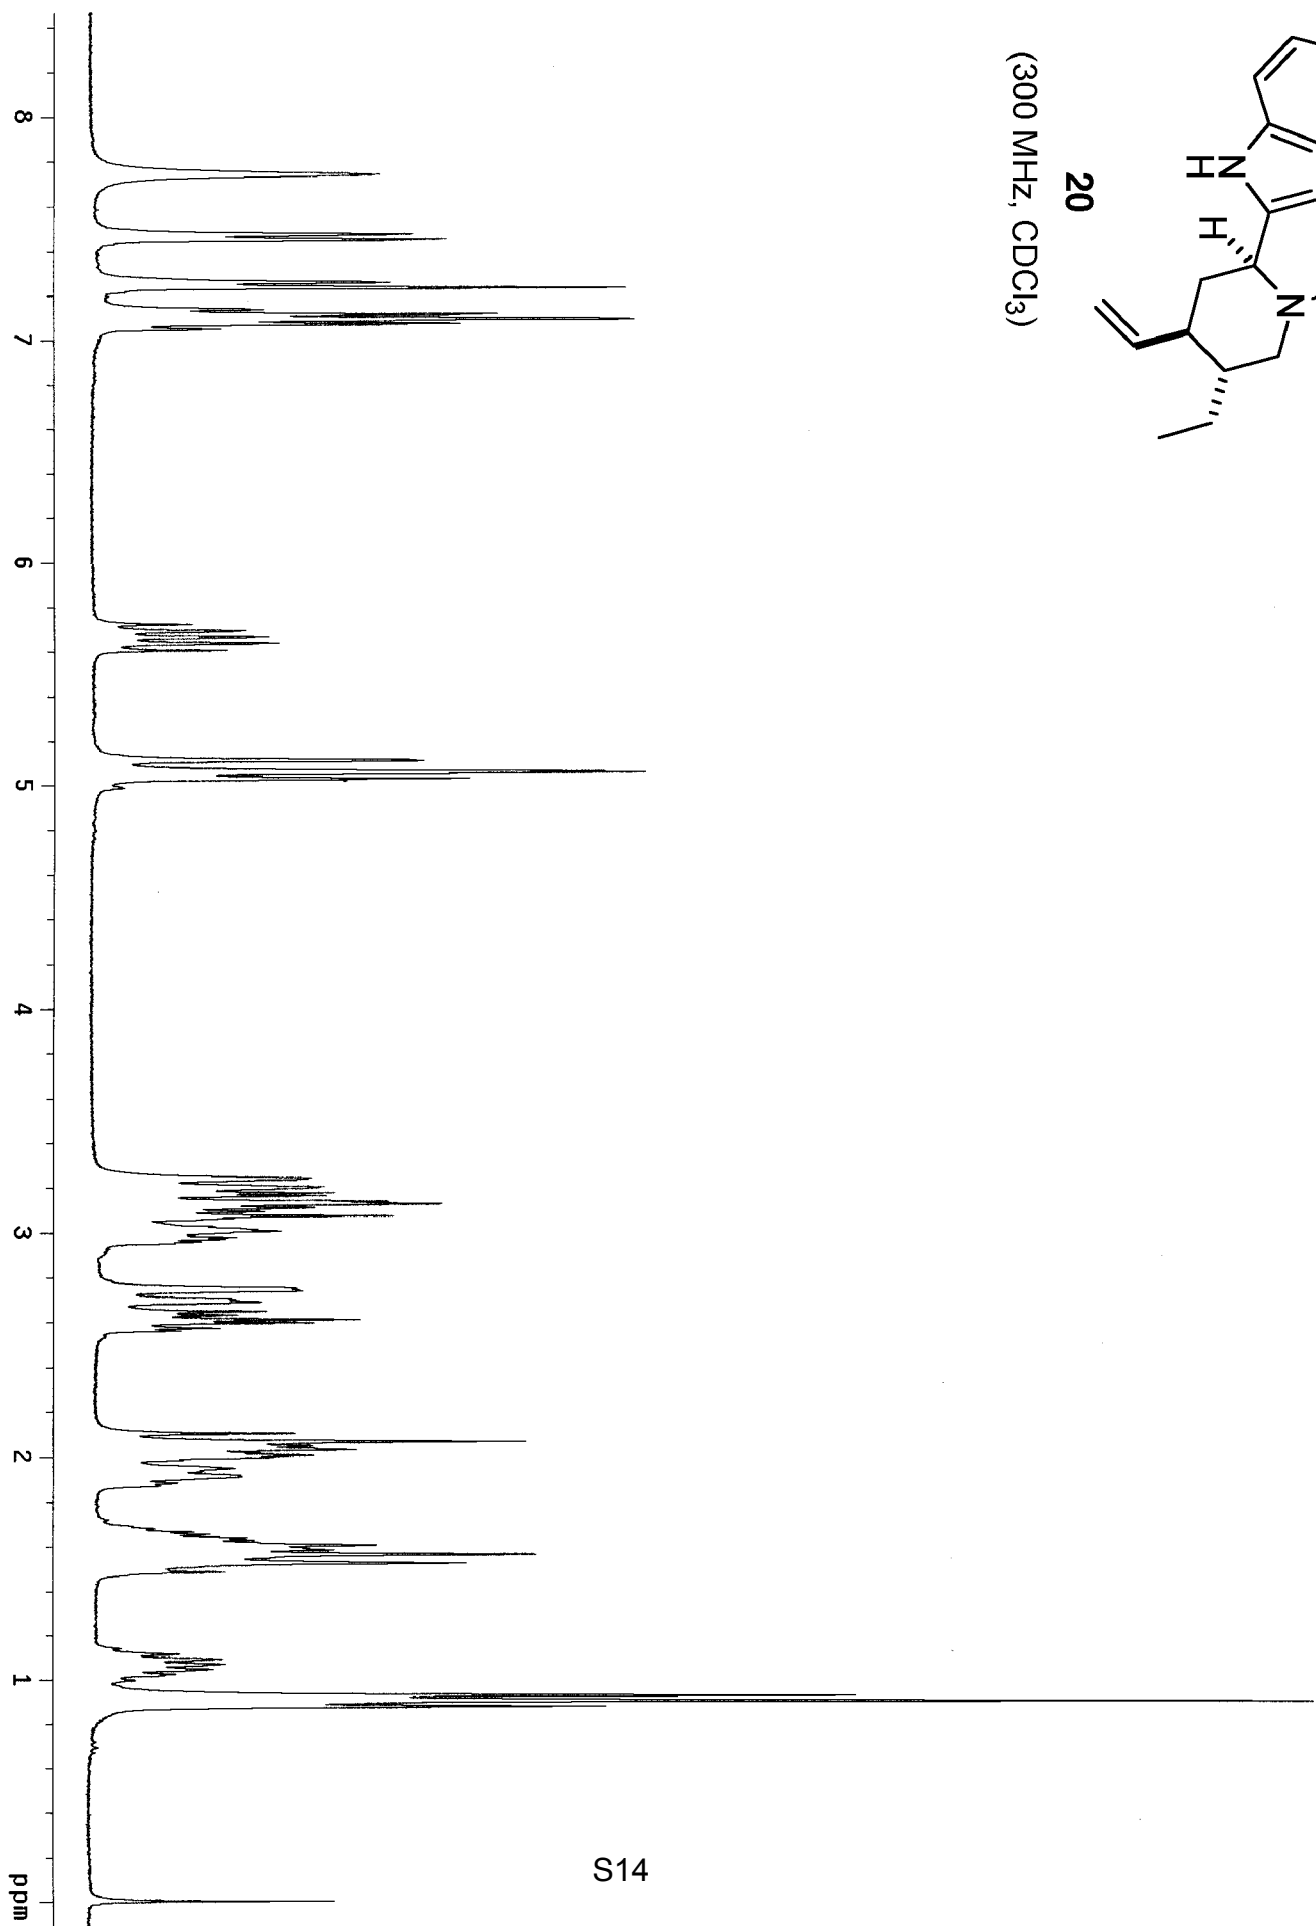

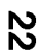

S15

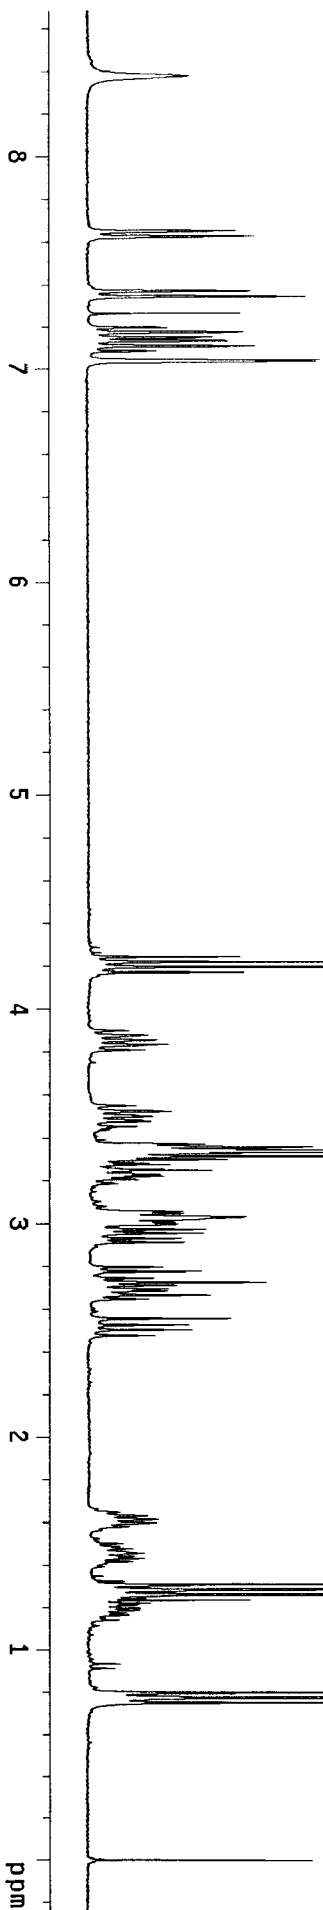

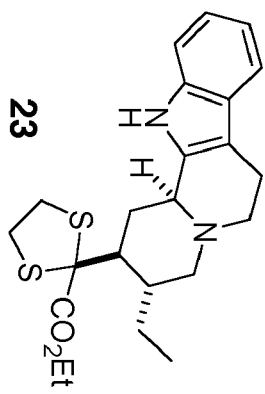

(300 MHz, C<sub>6</sub>D<sub>6</sub>)

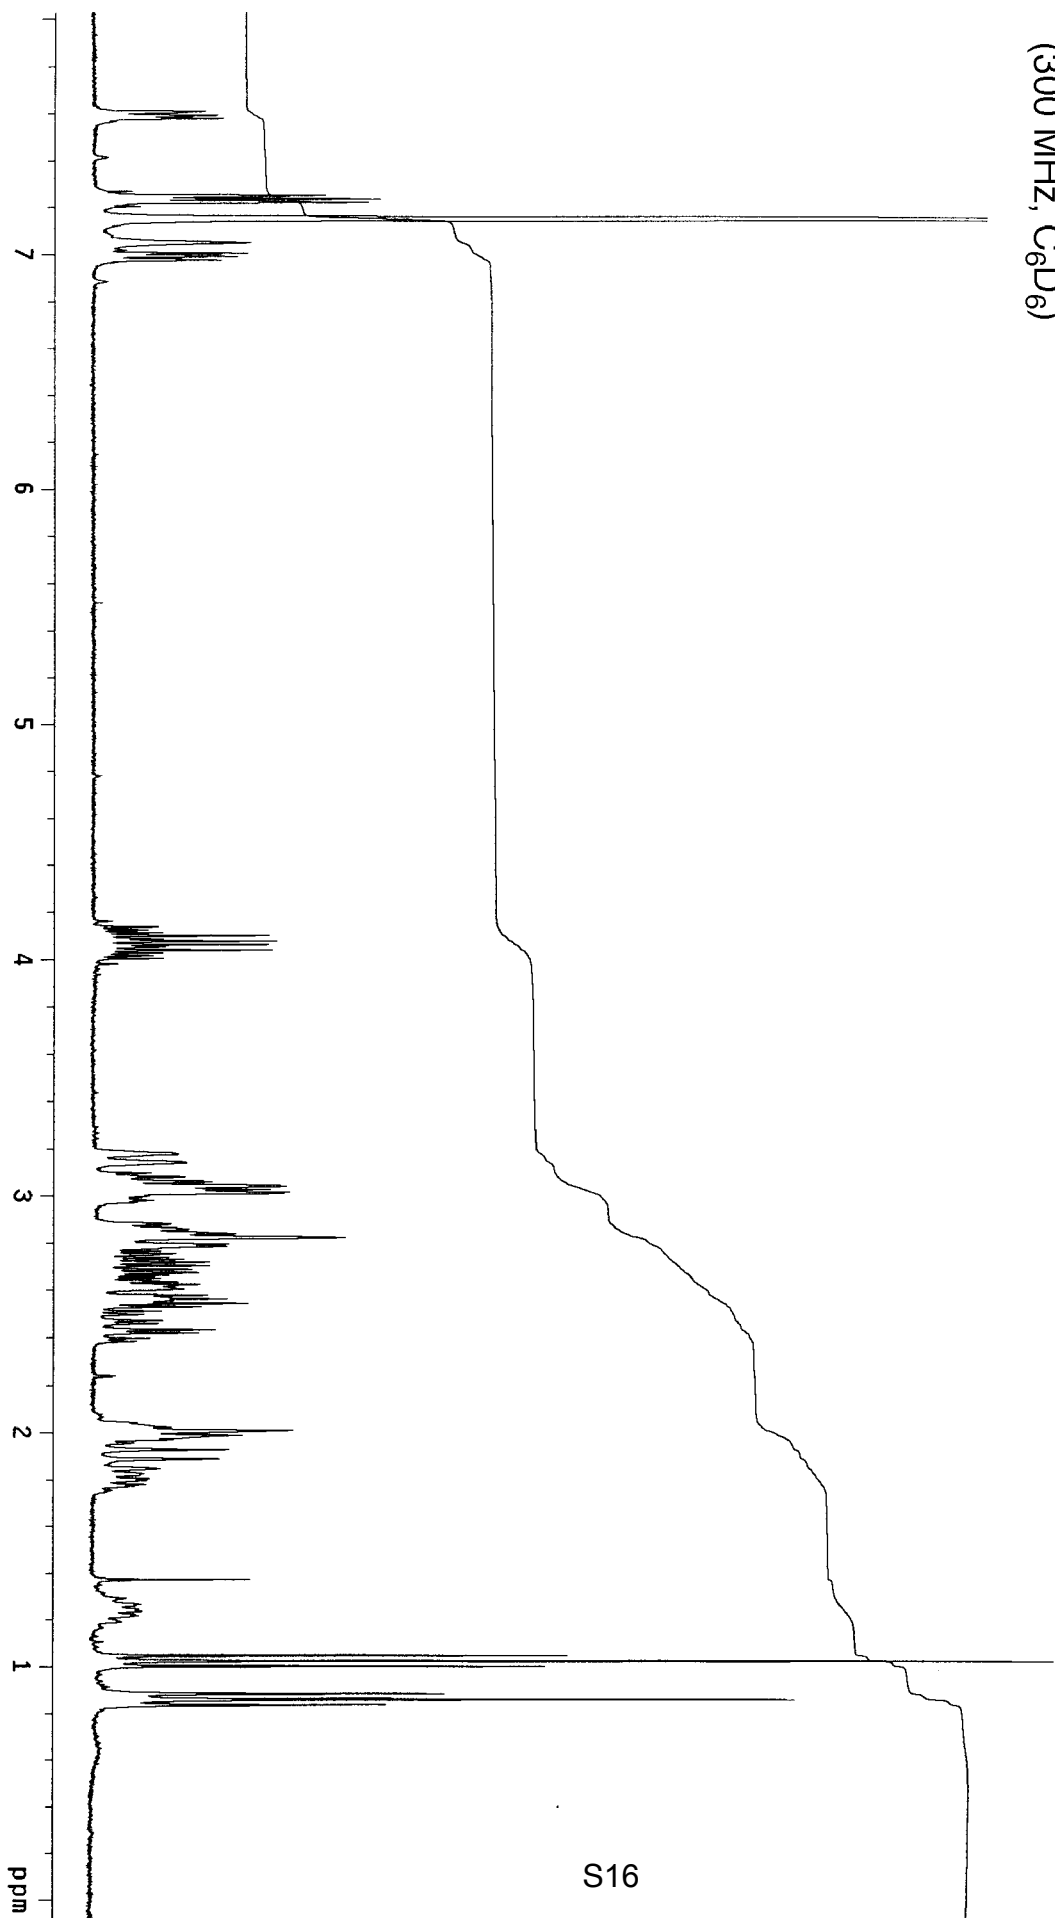



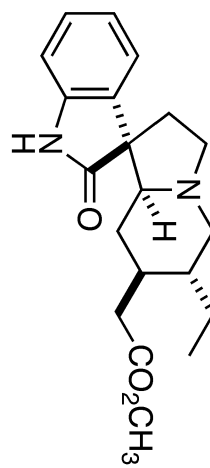

**26**

(500 MHz, DMSO  $d_6$ )

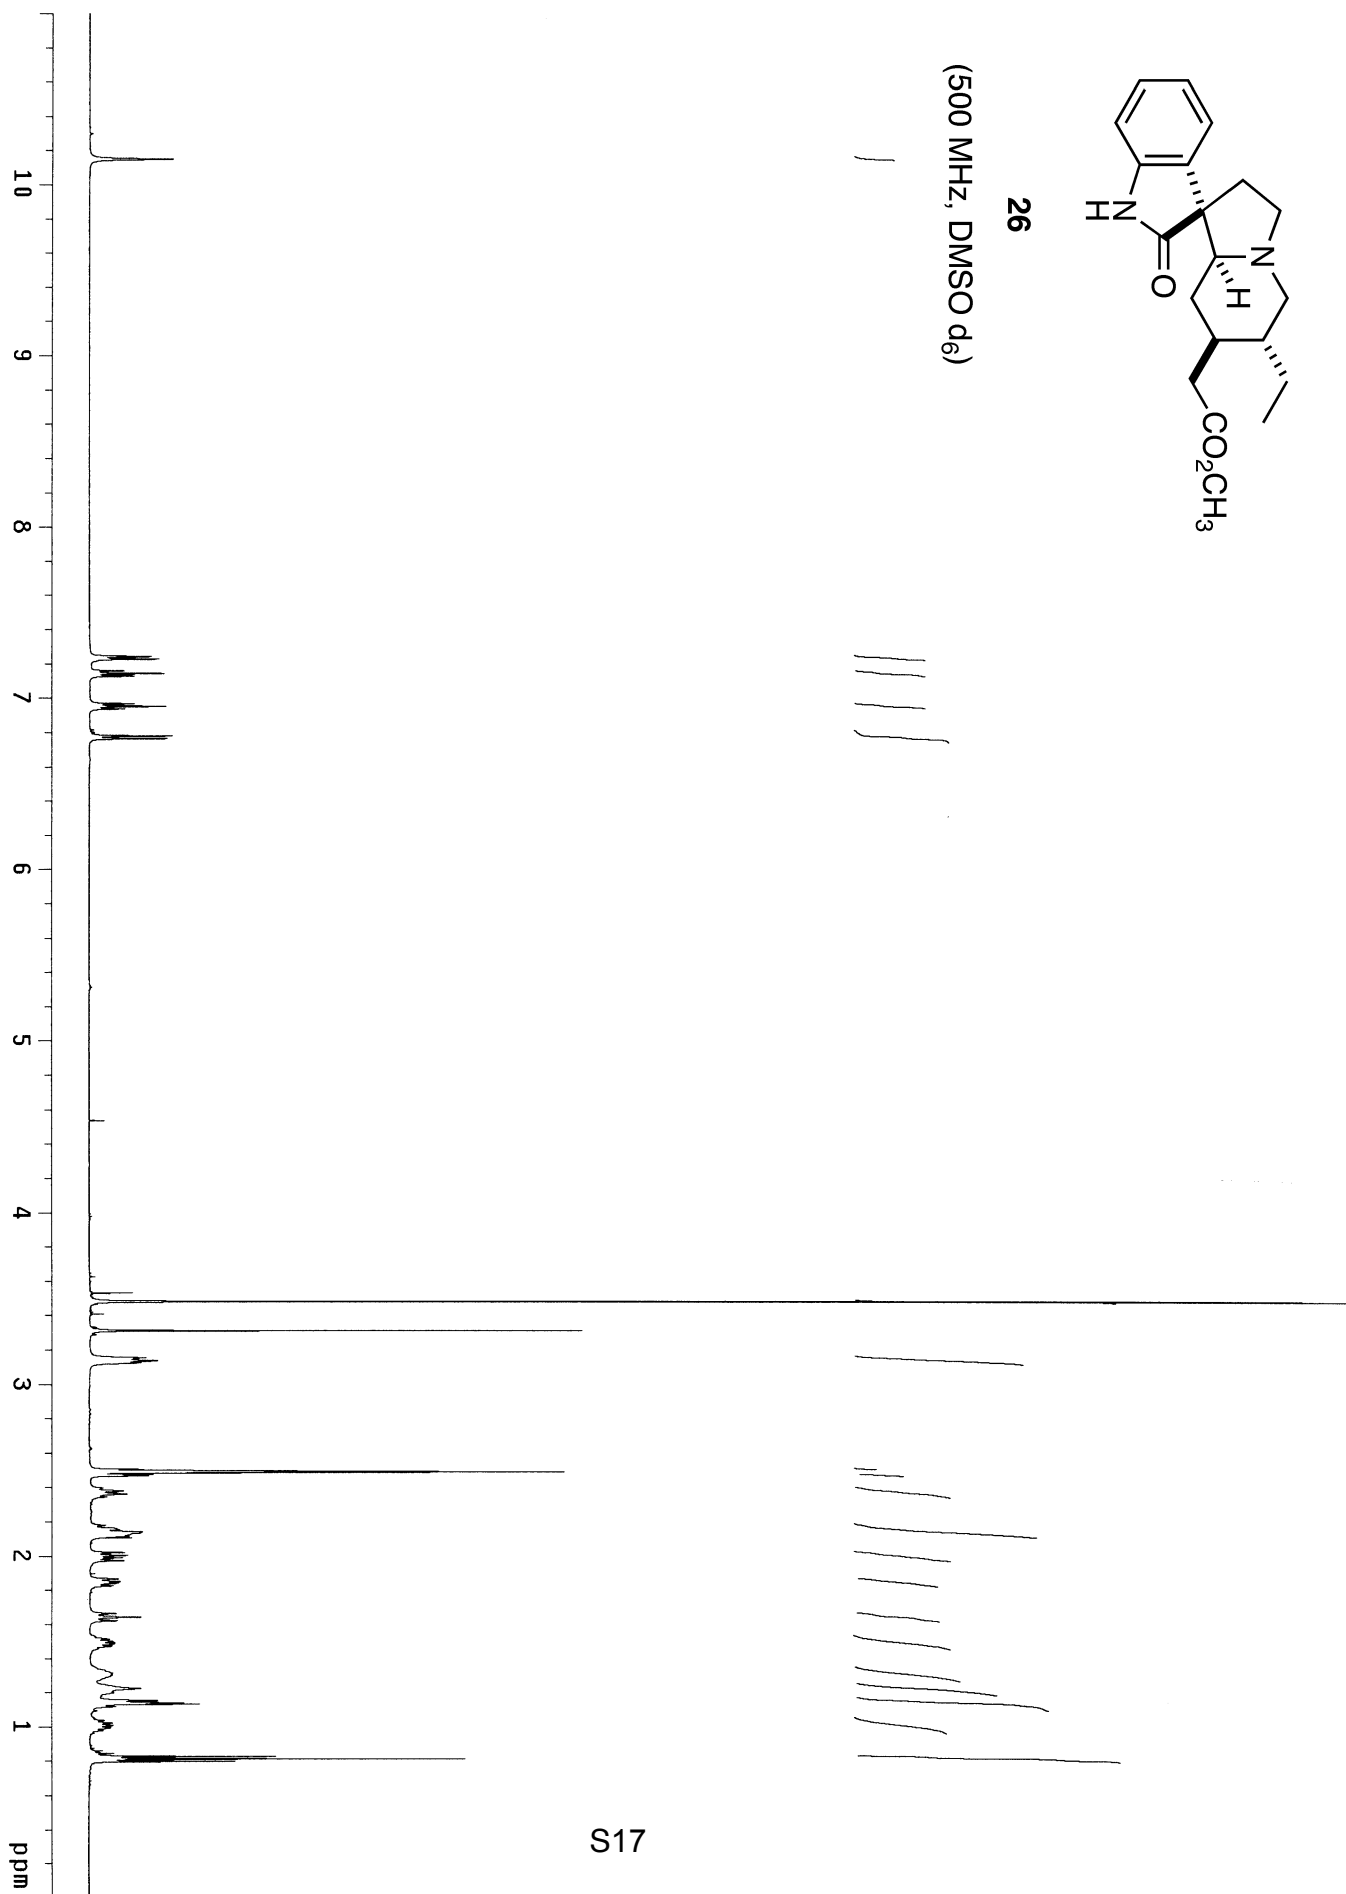

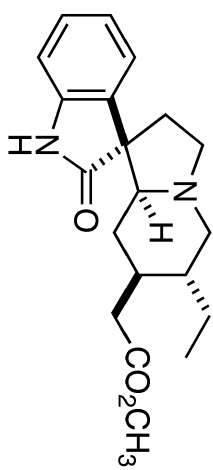

*epi*-26

(500 MHz,  $\text{DMSO}-d_6$ )

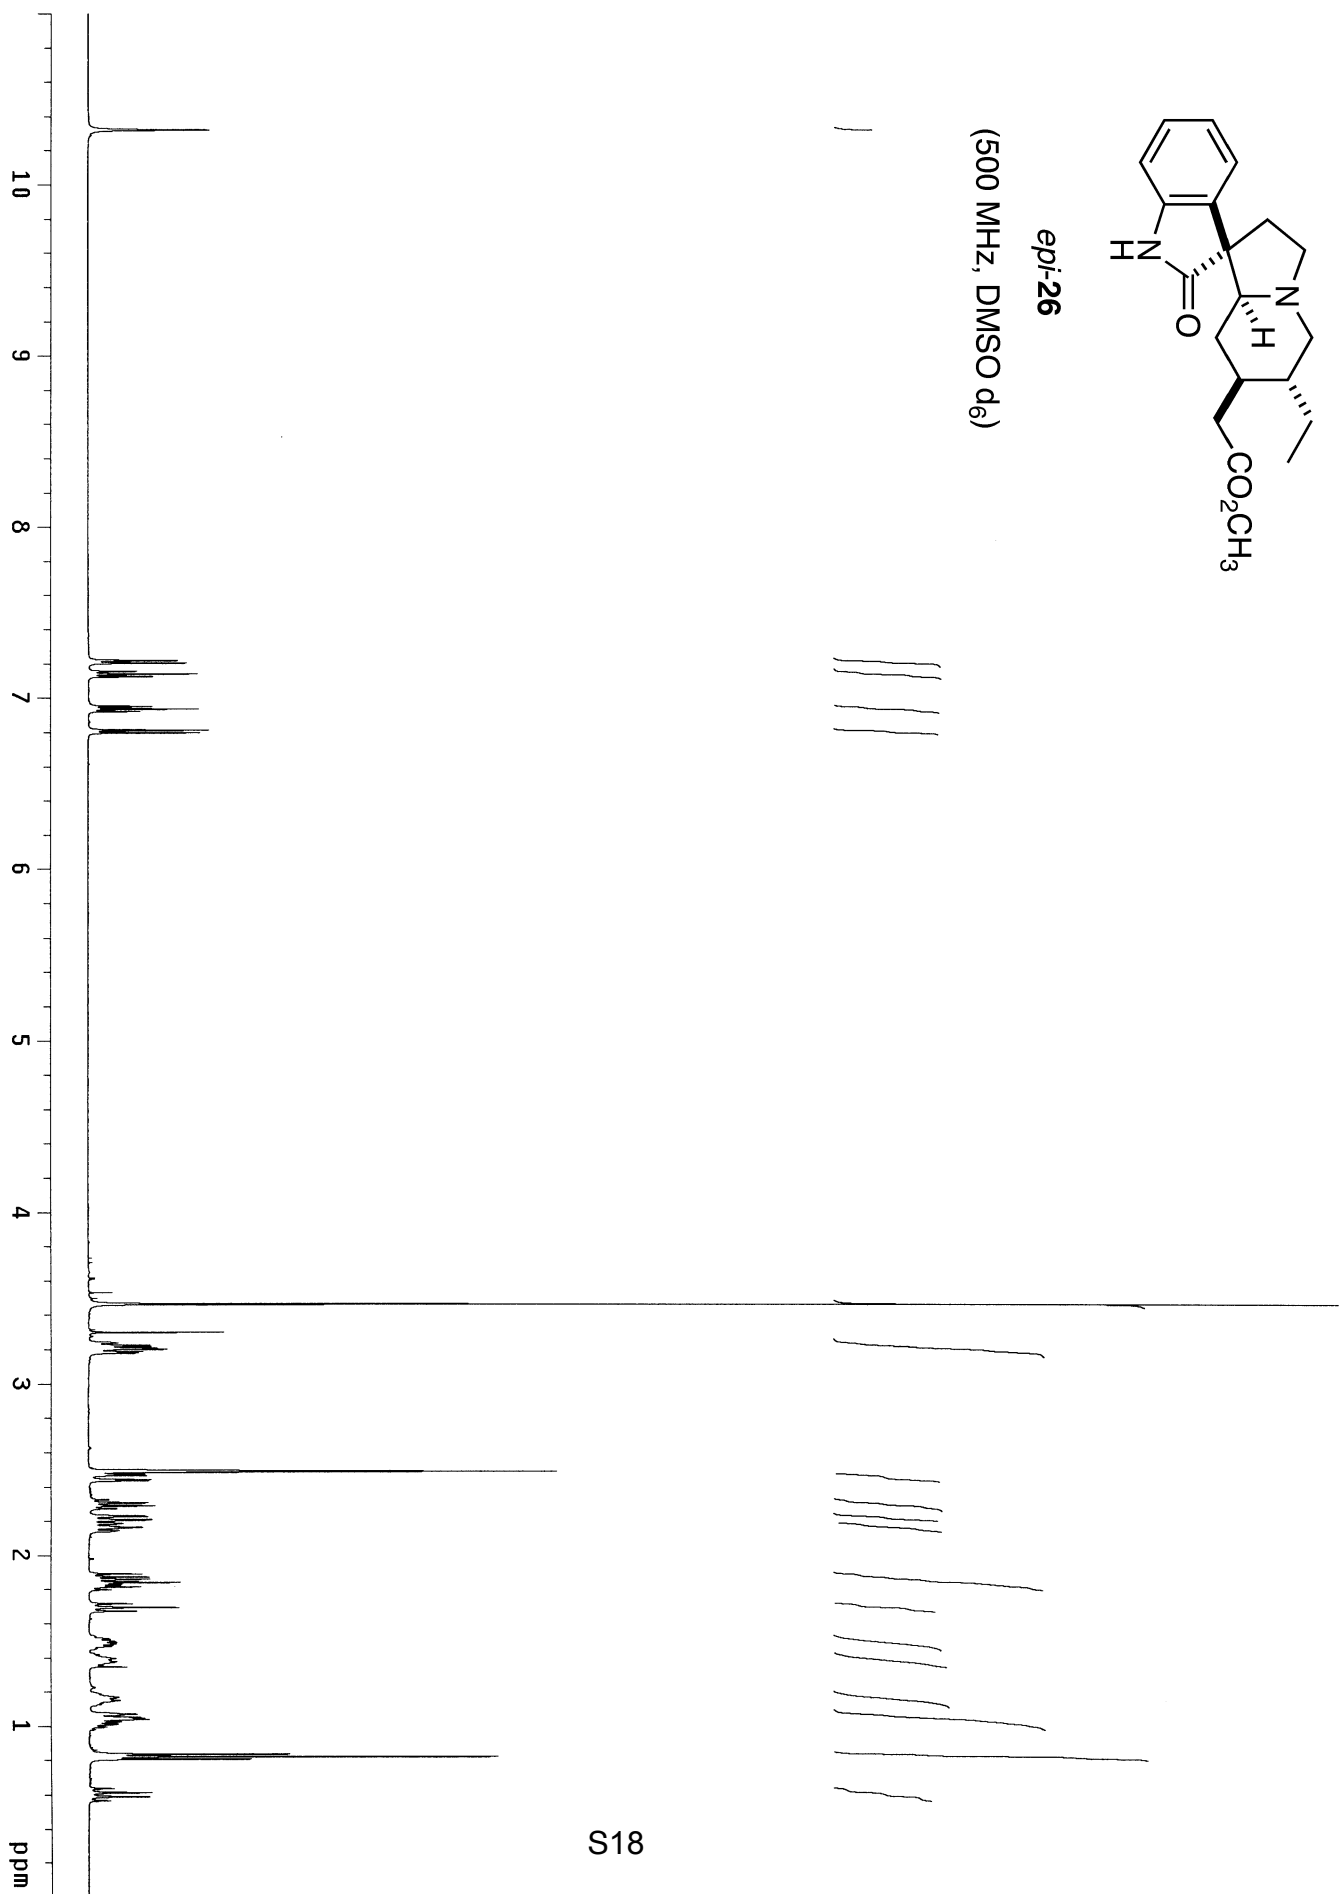

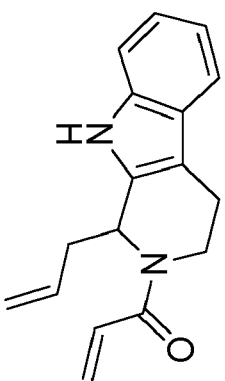

**33**

(400 MHz, CDCl<sub>3</sub>)

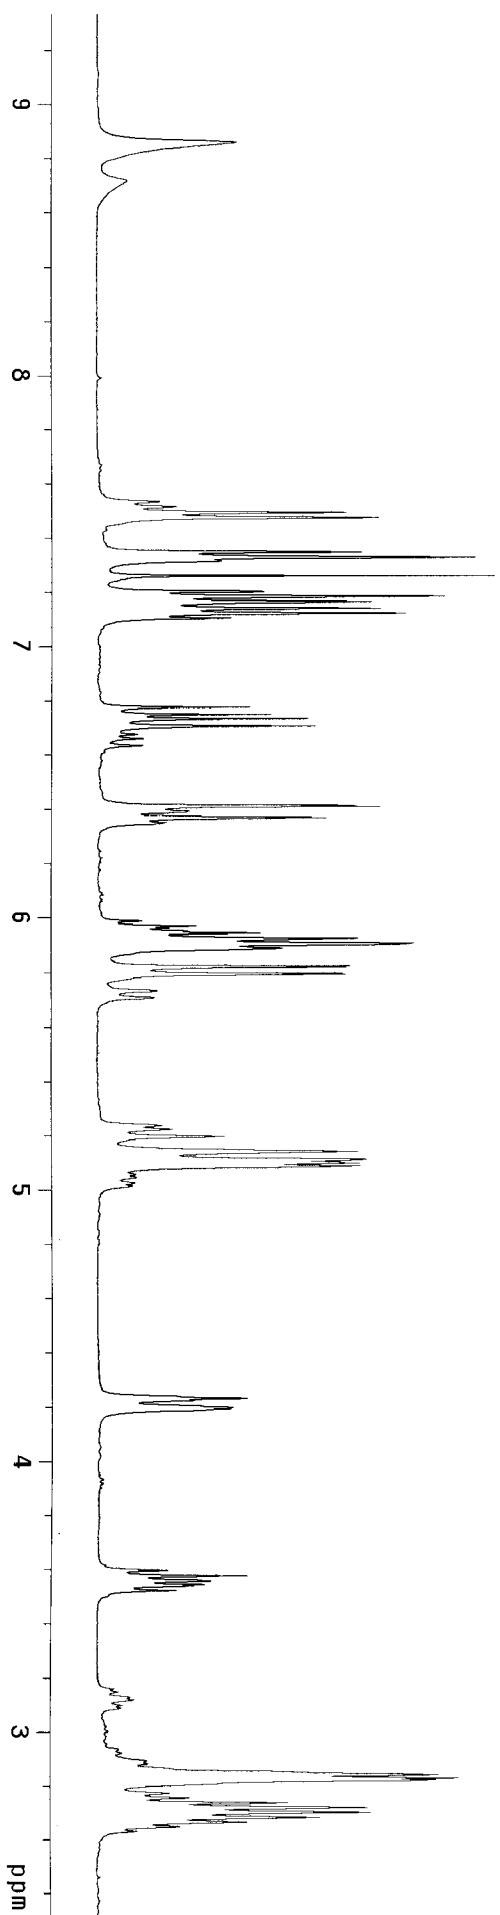

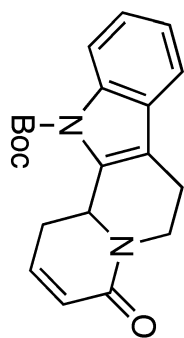

35

(500 MHz, CDCl<sub>3</sub>)

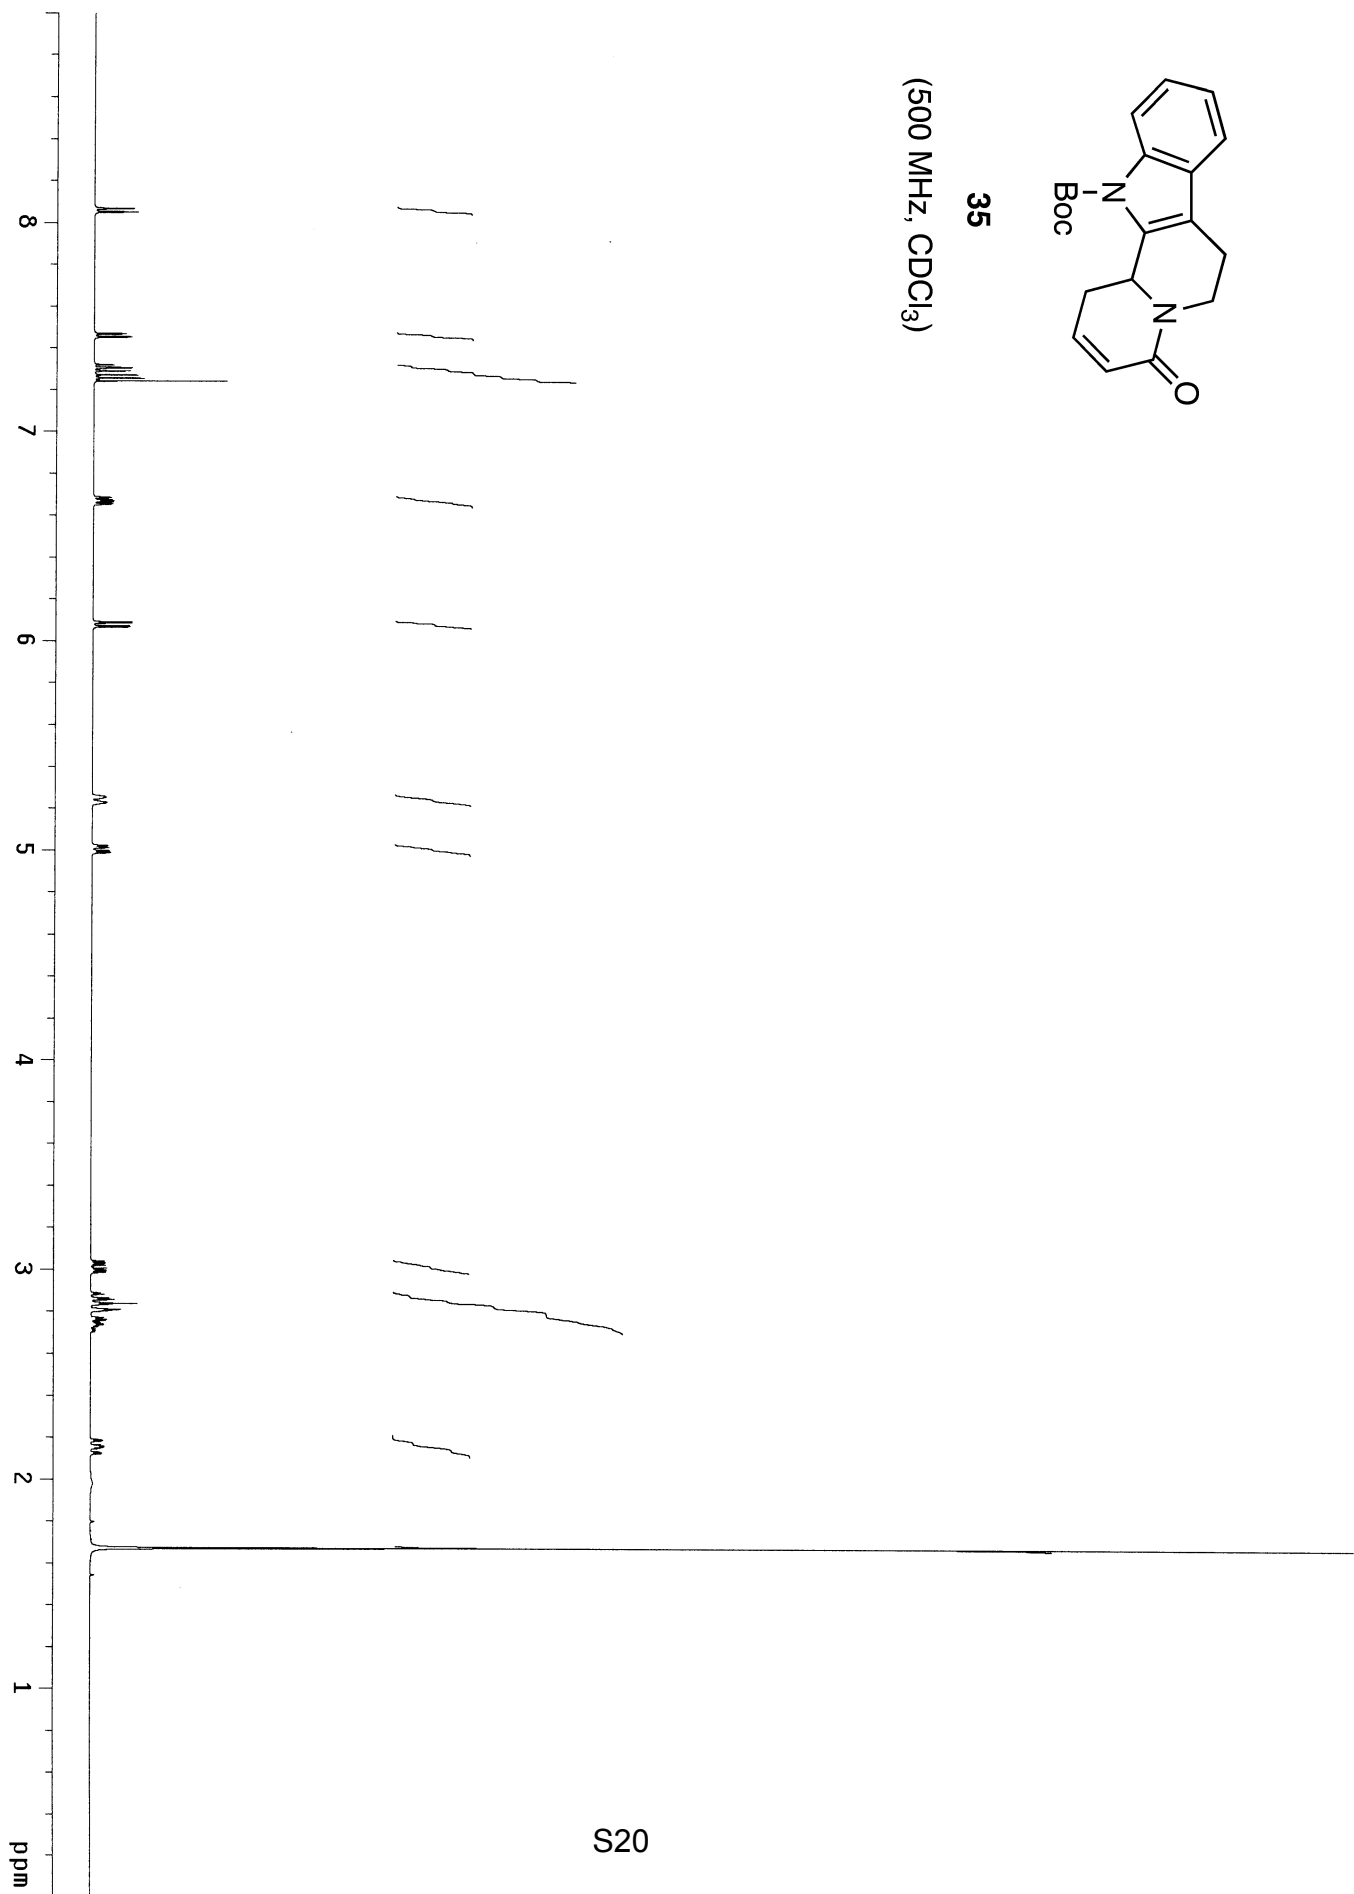

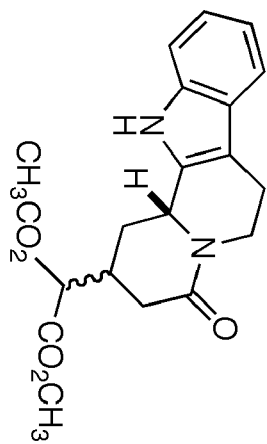

2-(4-Oxo-1,2,3,4,6,7,12,12b-octahydroindolo-  
[2,3-a]quinolizin-2-yl)malonic acid dimethyl ester.

(300 MHz,  $\text{CDCl}_3$ )

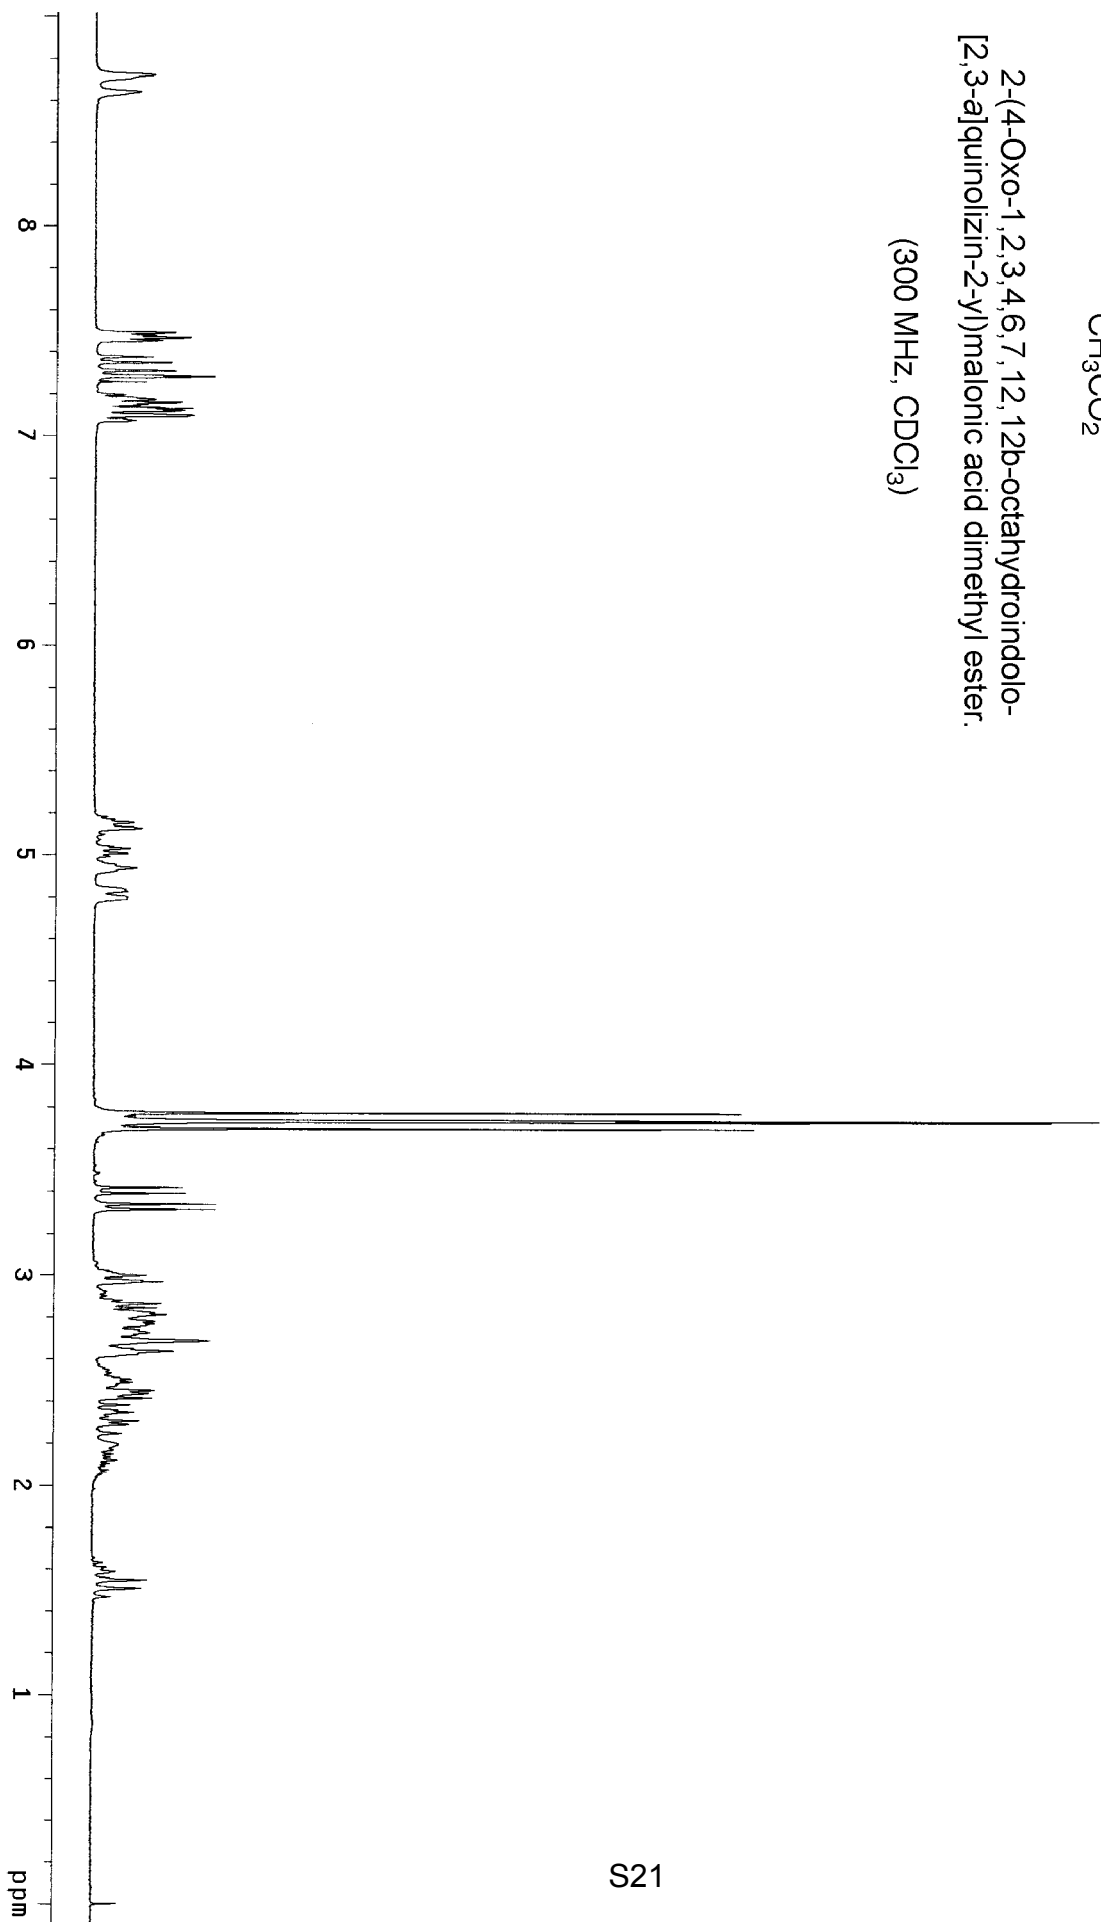

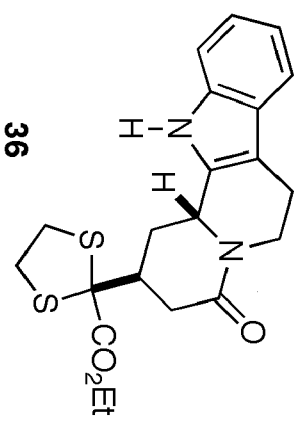

(400 MHz, CDCl<sub>3</sub>)

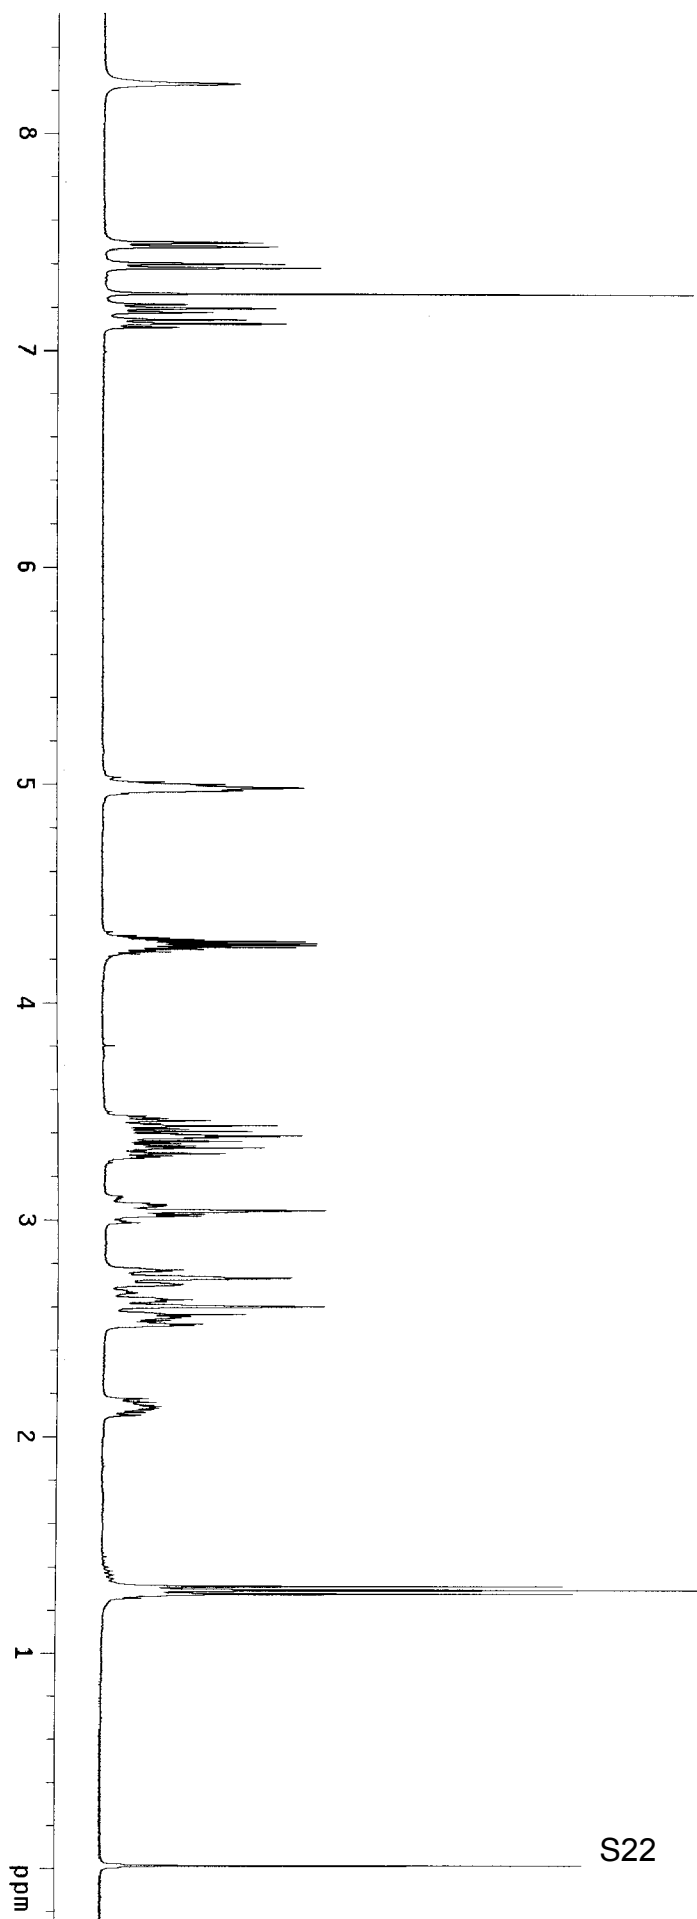

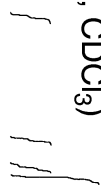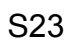

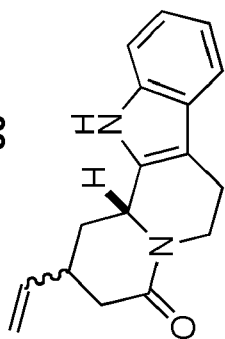

**38**

(400 MHz, CDCl<sub>3</sub>)

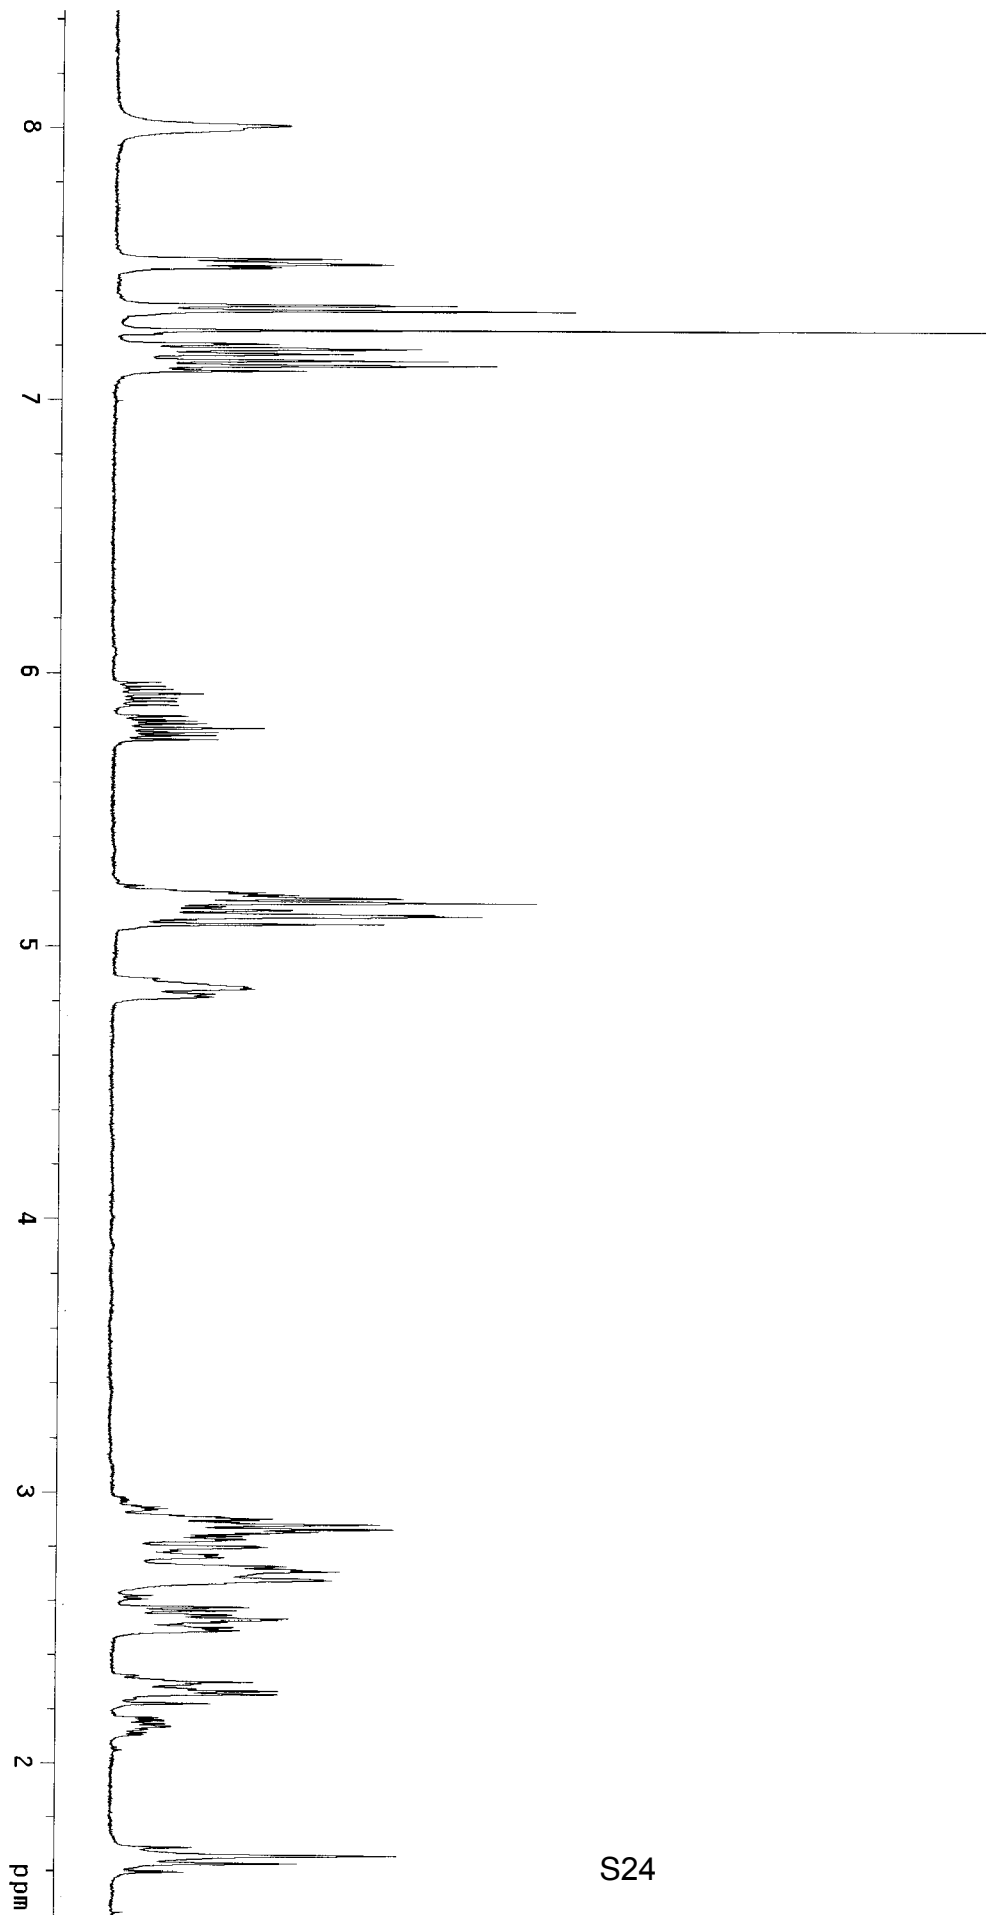



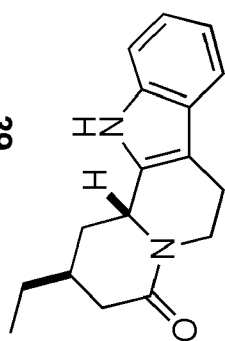

**39**

(400 MHz, CDCl<sub>3</sub>)

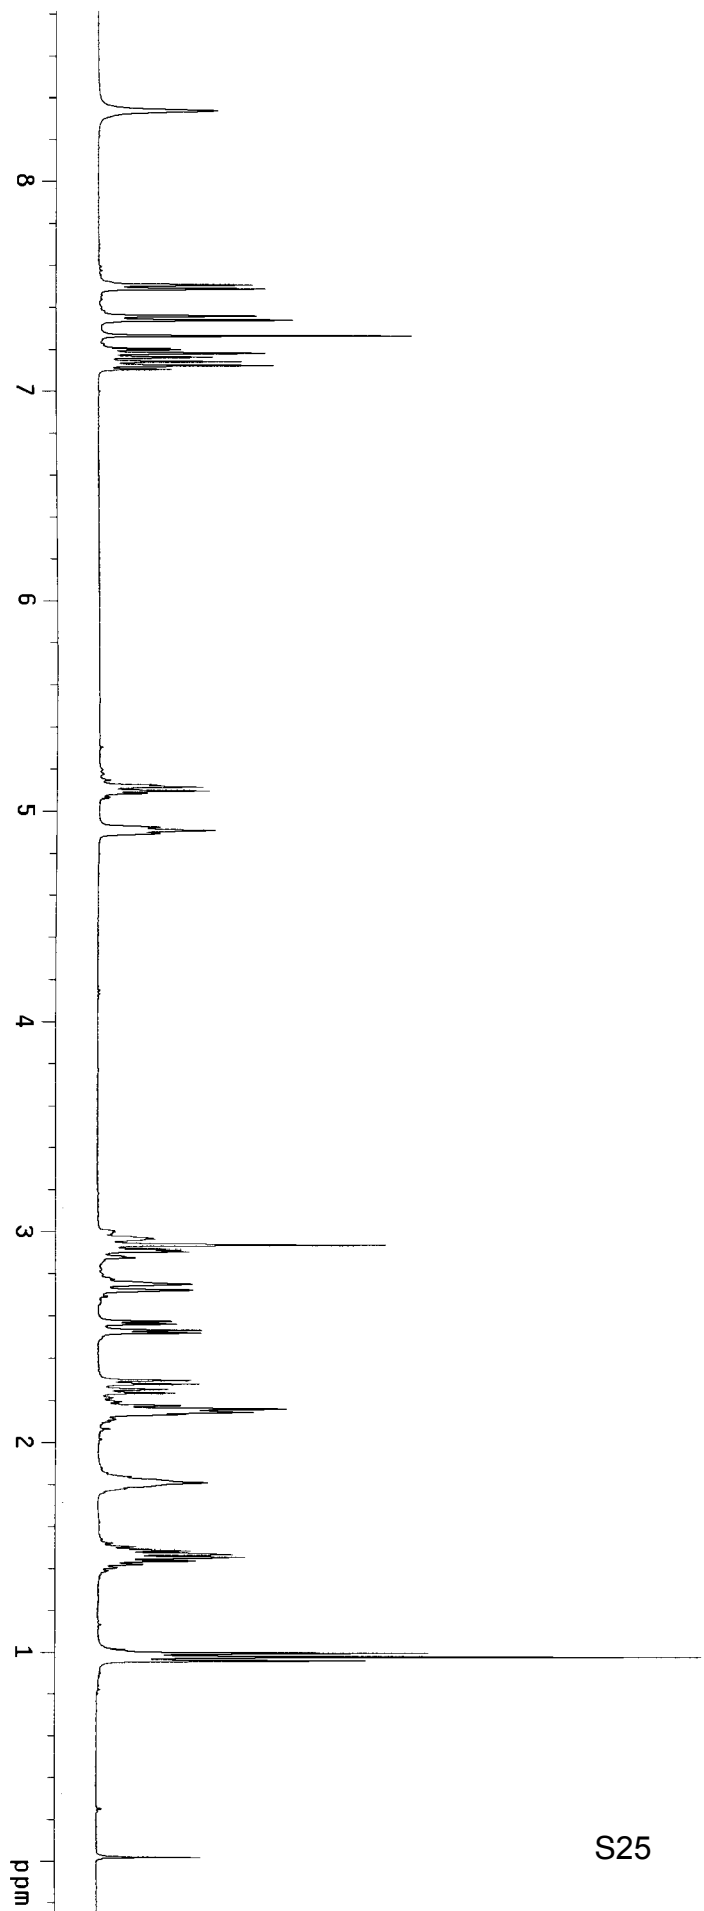

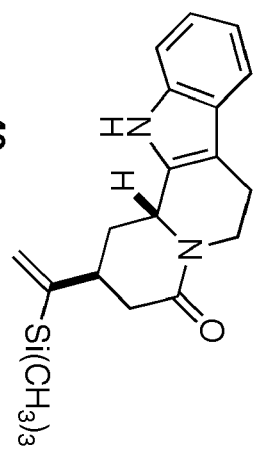

**40**

(400 MHz, CDCl<sub>3</sub>)

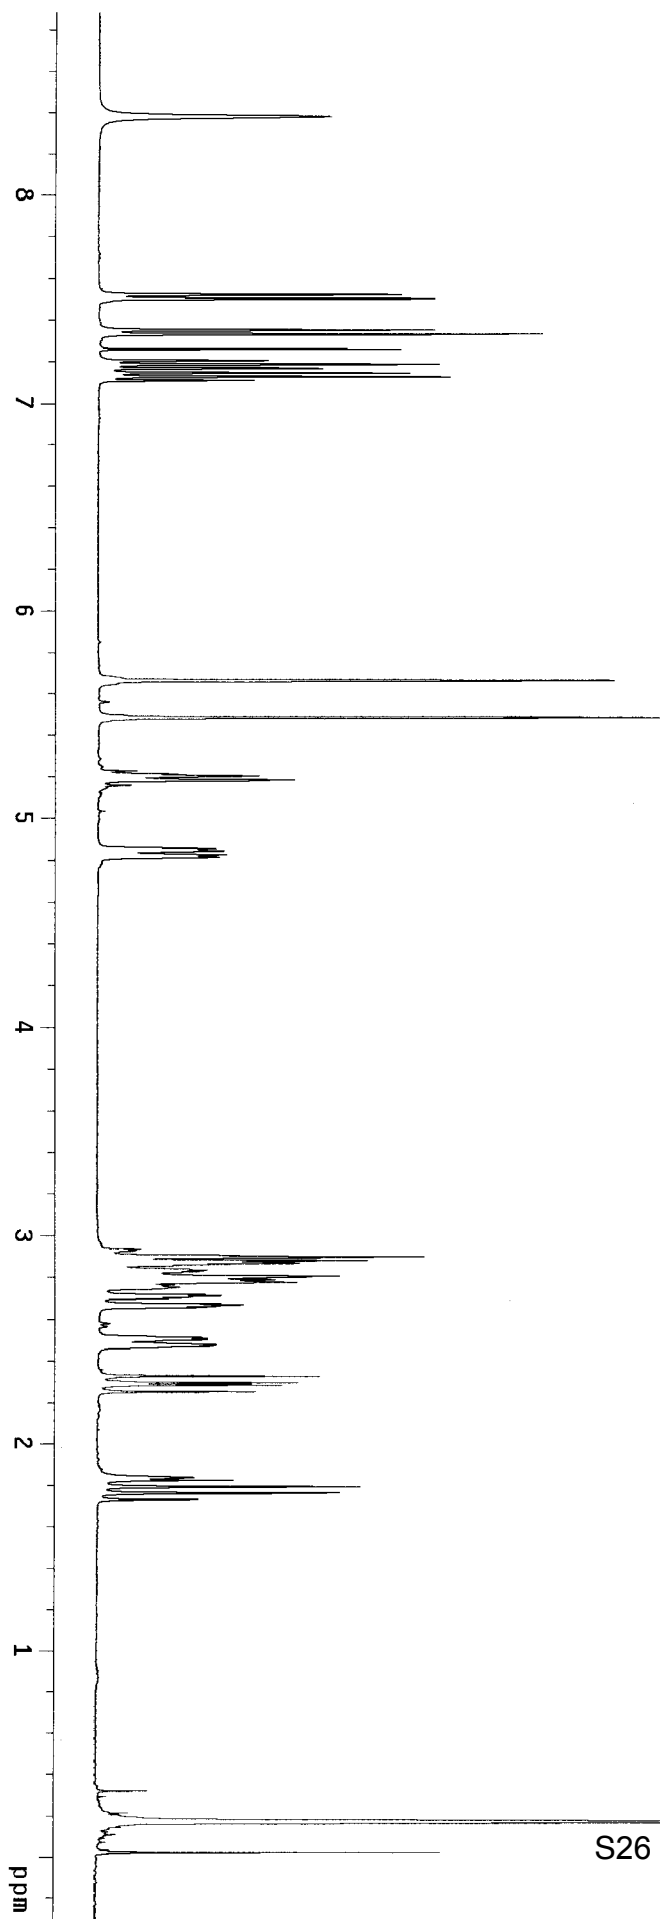

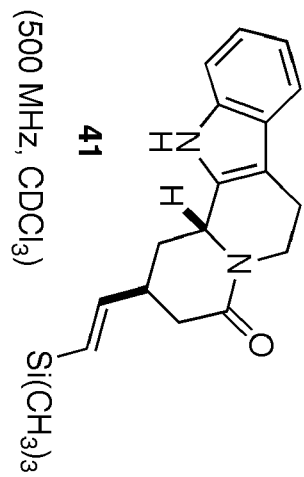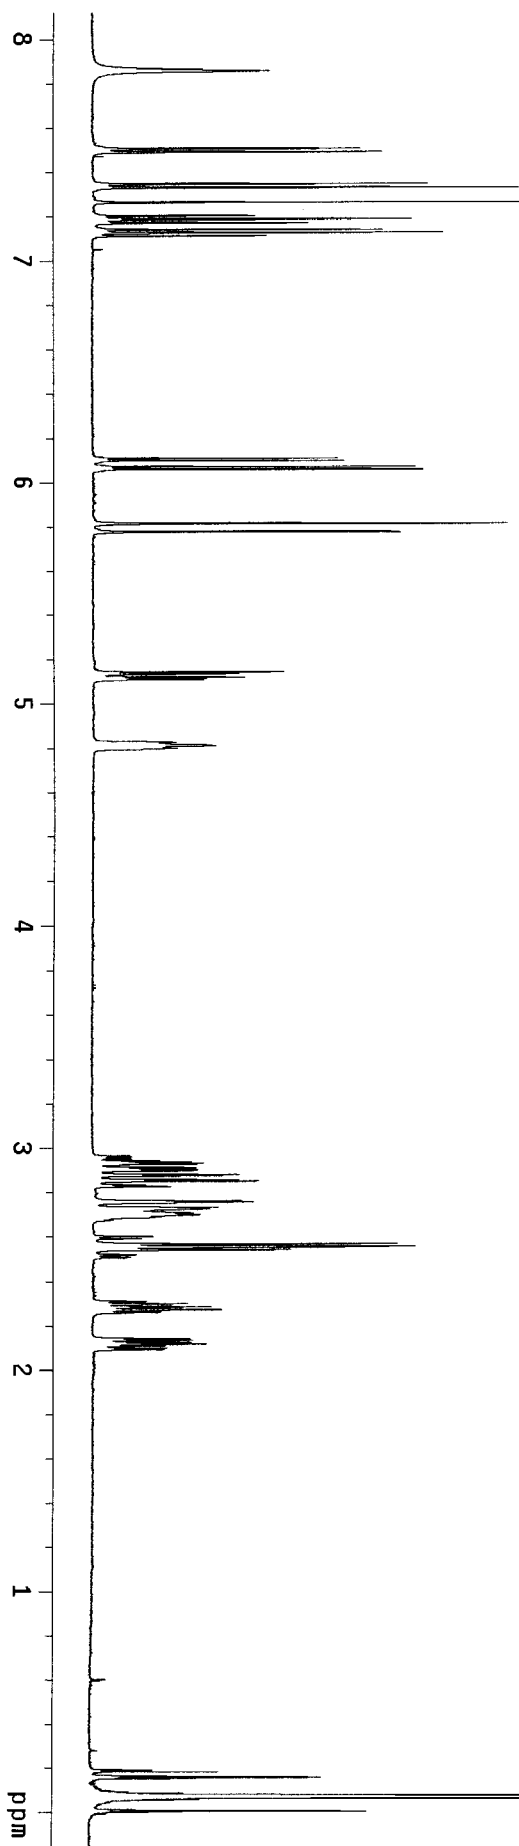

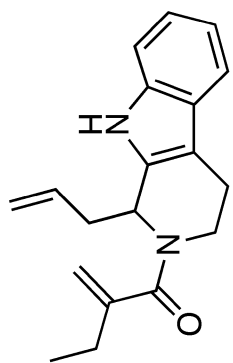

1-(1-Allyl-1,3,4,9-tetrahydro-β-carbolin-2-yl)-2-ethylpropenone

(500 MHz, CDCl<sub>3</sub>)

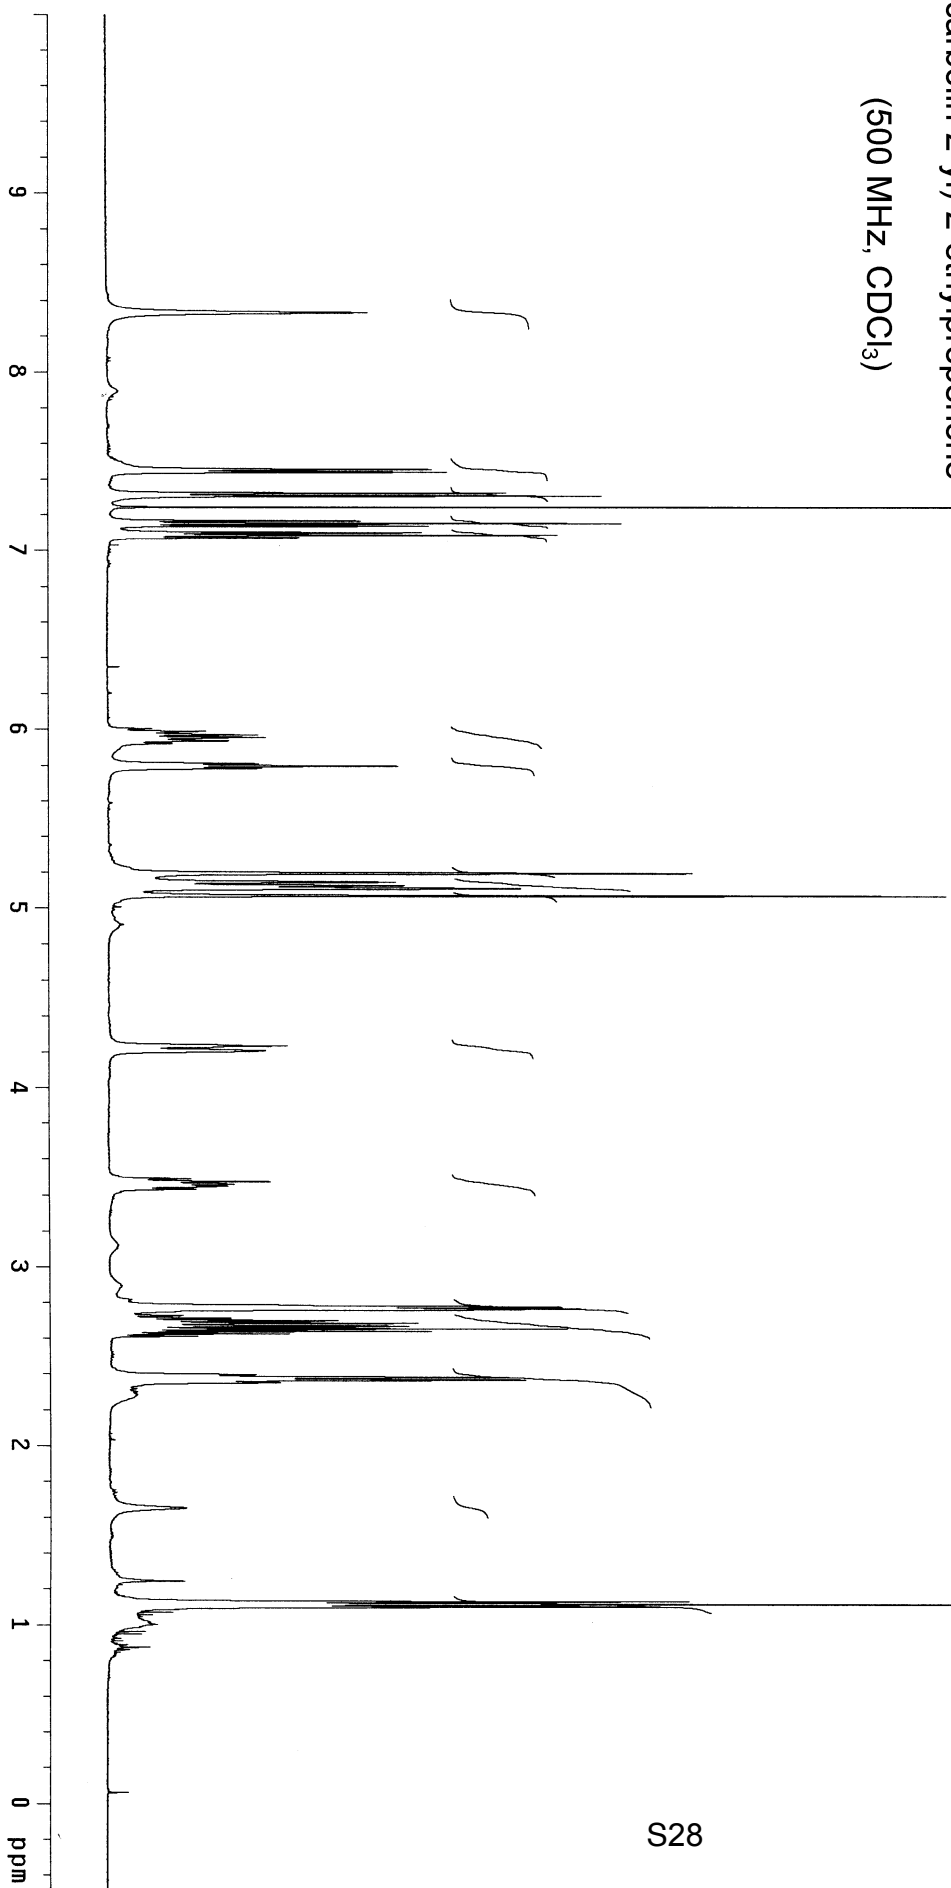

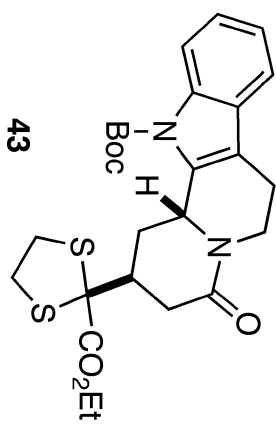

(500 MHz, CDCl<sub>3</sub>)

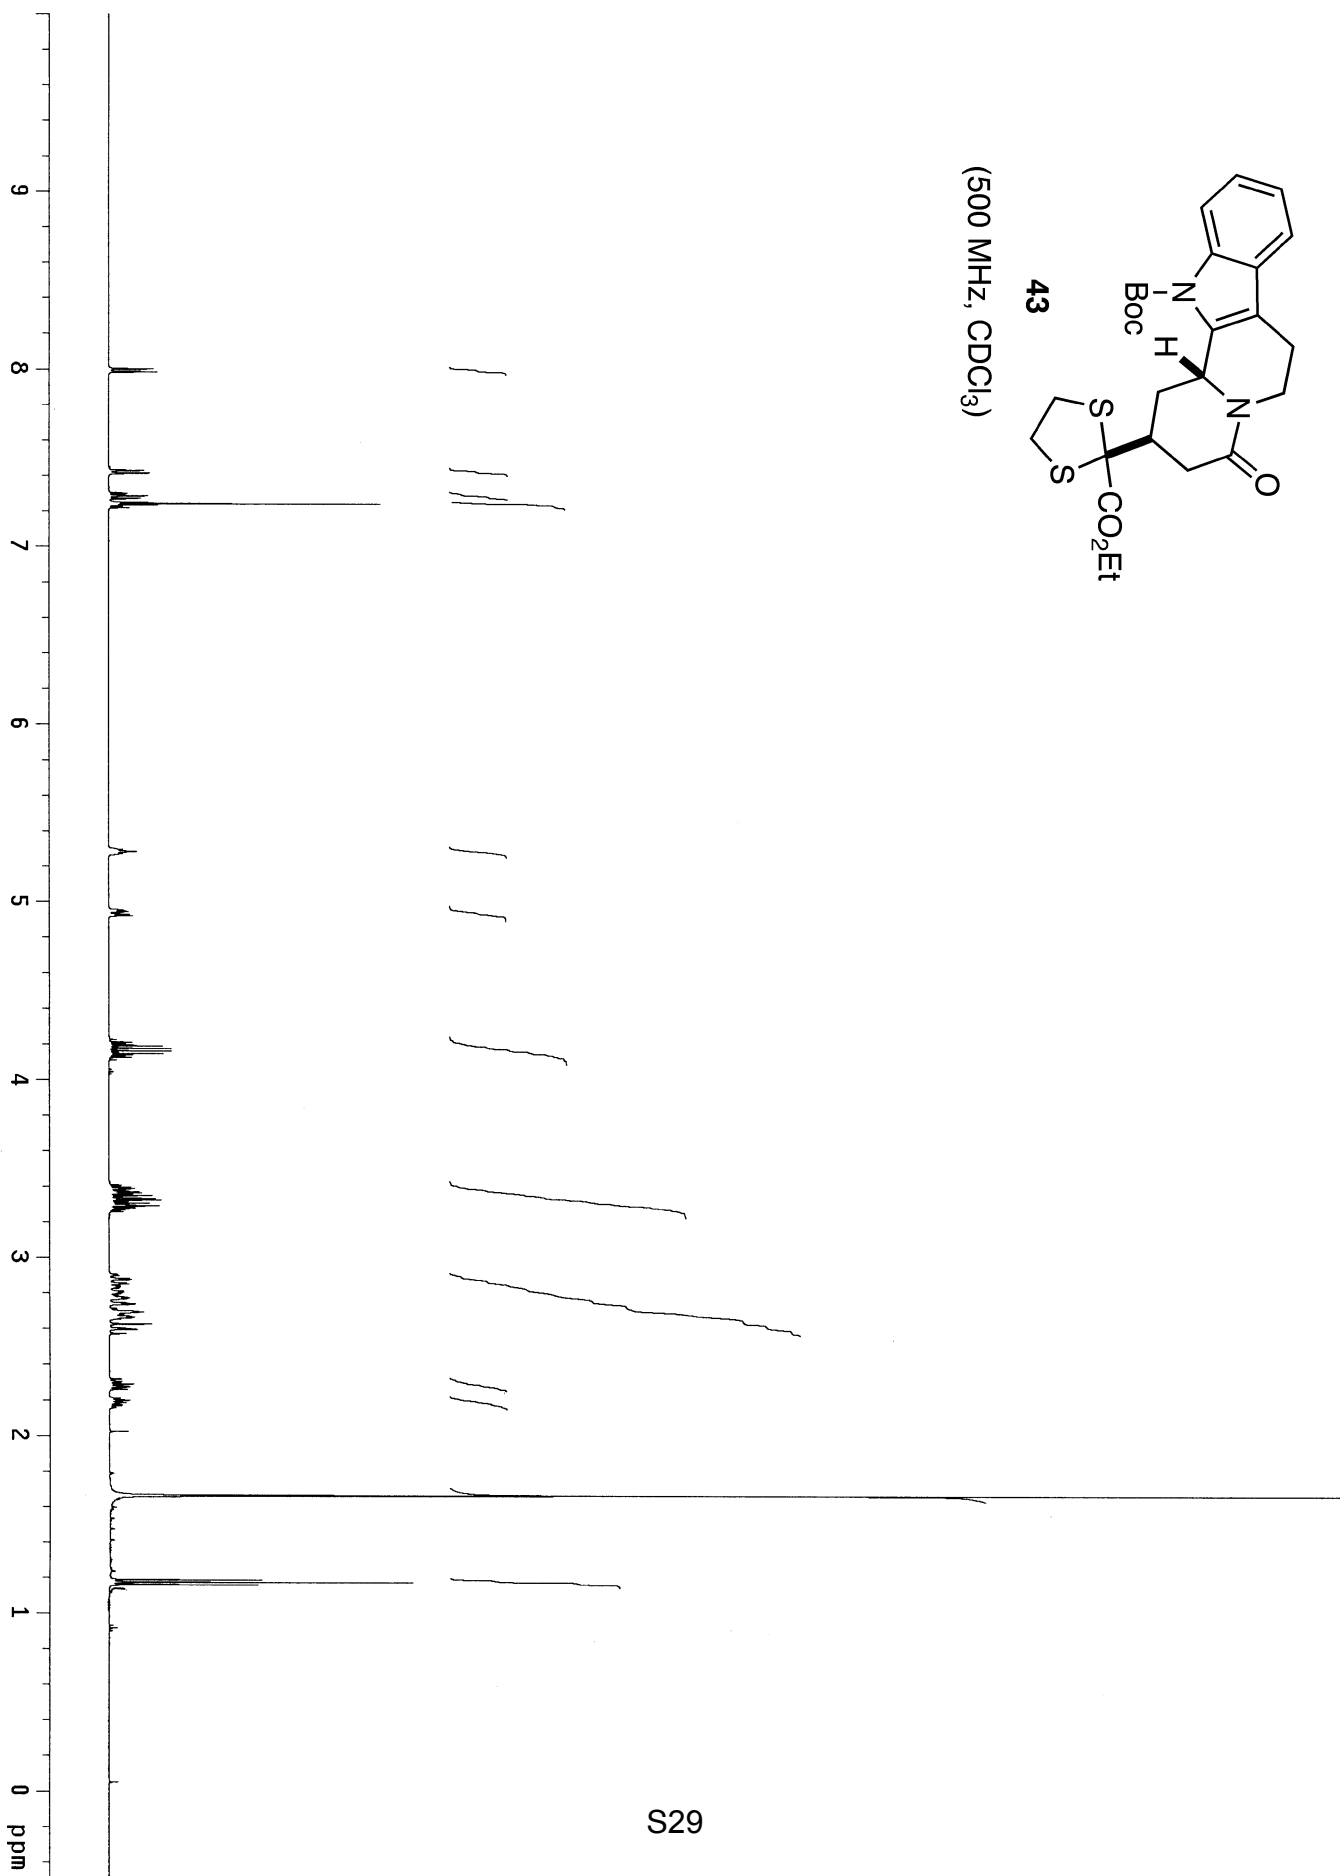

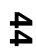


CCOC(=O)[C@H](C)C(=O)C

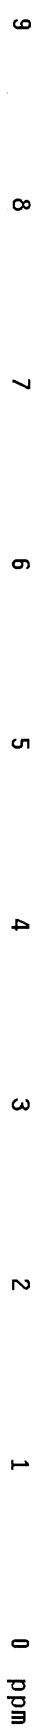

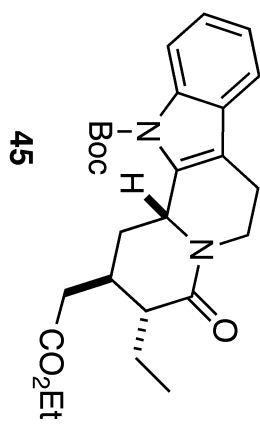

(500 MHz, CDCl<sub>3</sub>)

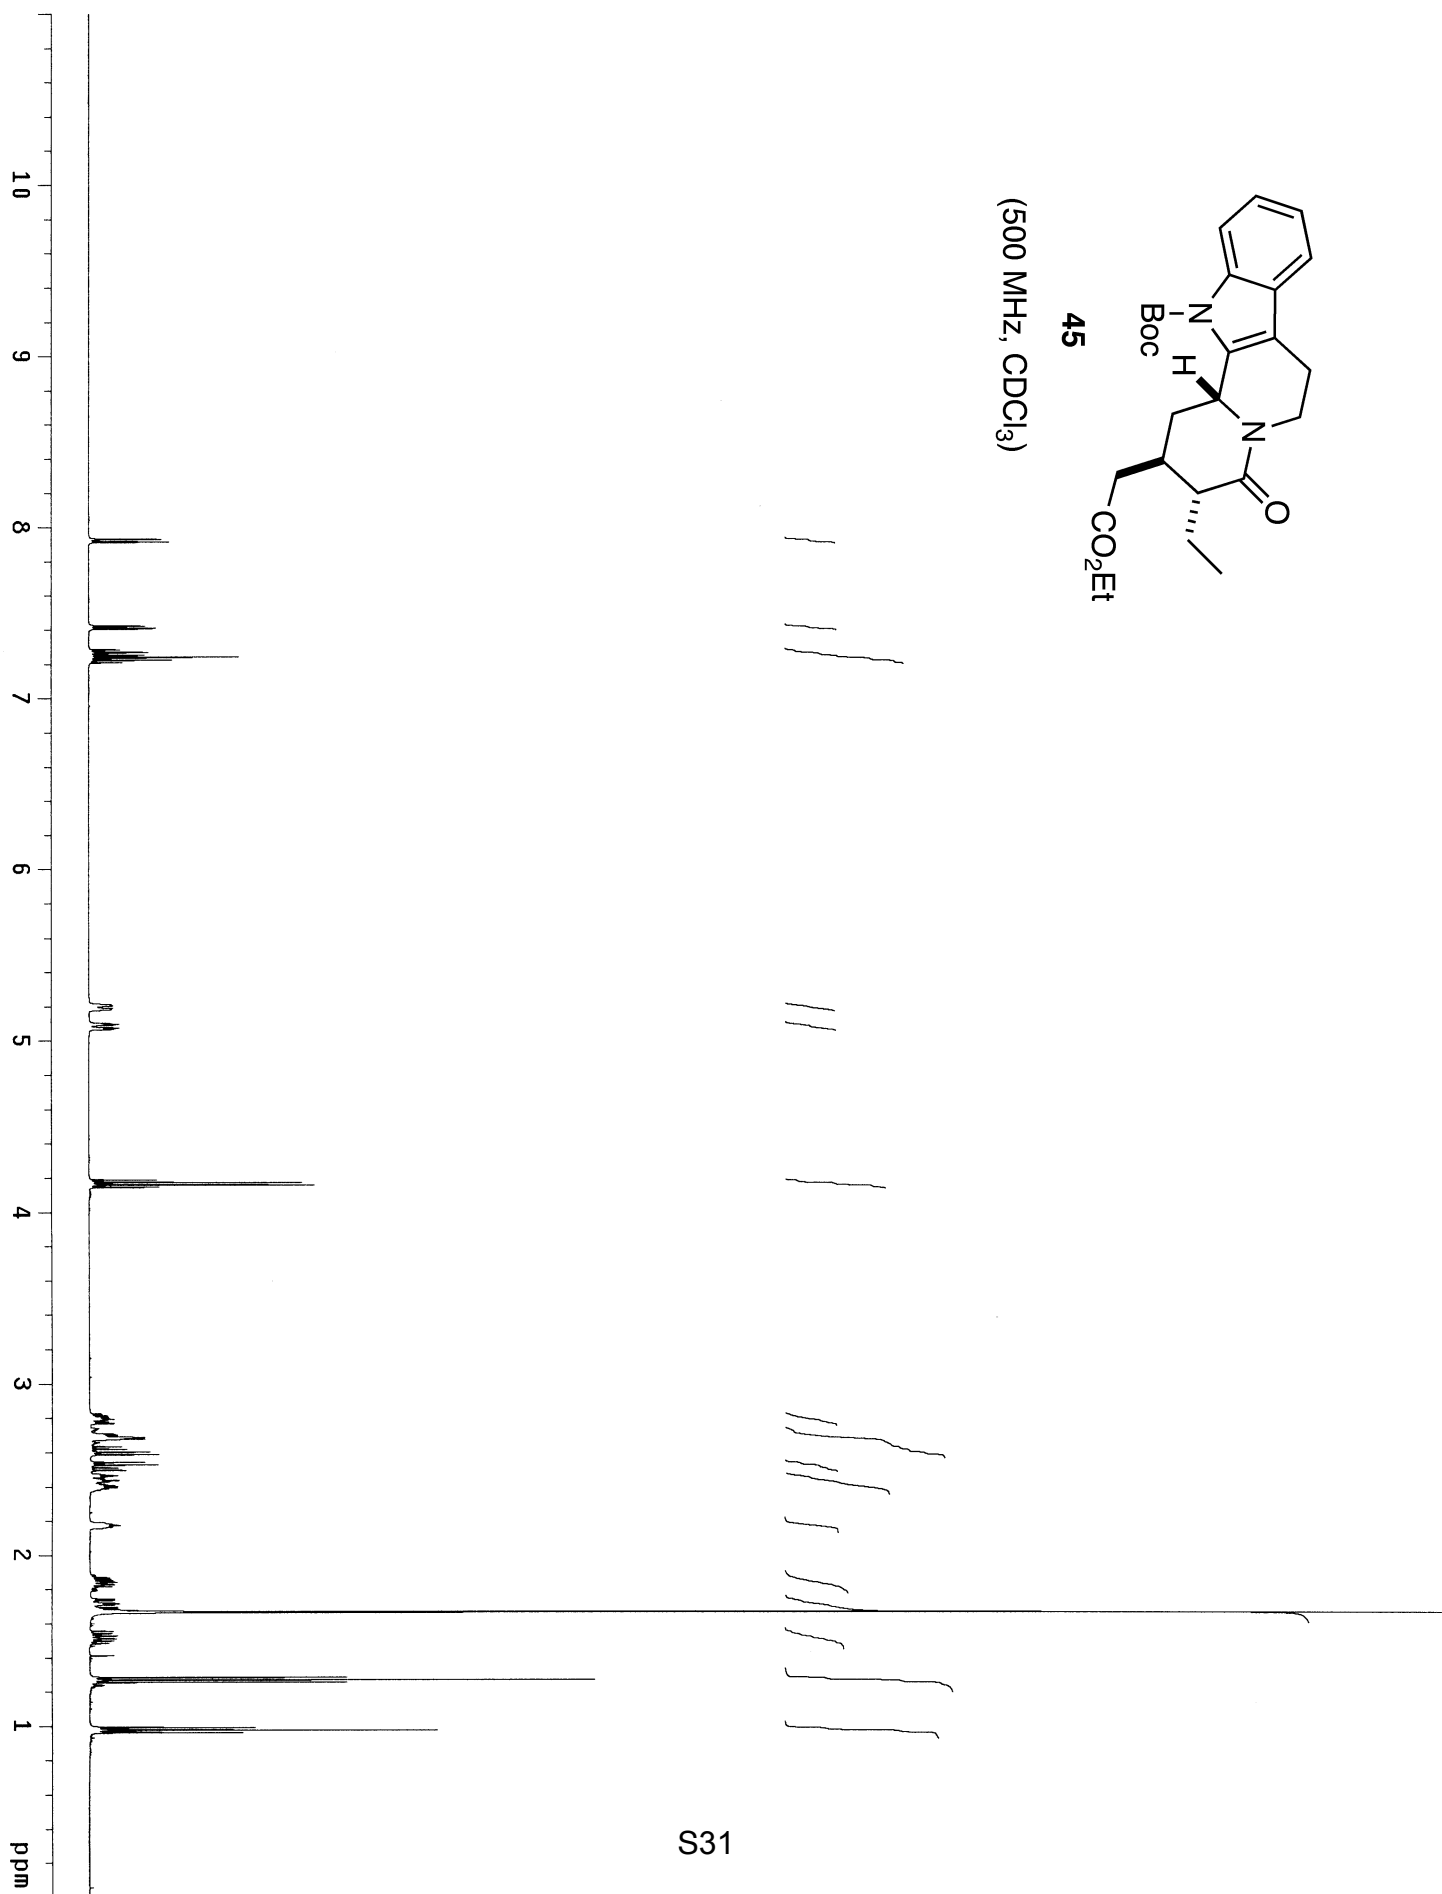

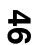 $\text{CO}_2\text{CH}_3$ 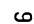

0 ppm



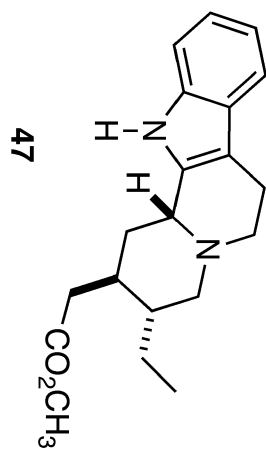

(500 MHz, CDCl<sub>3</sub>)

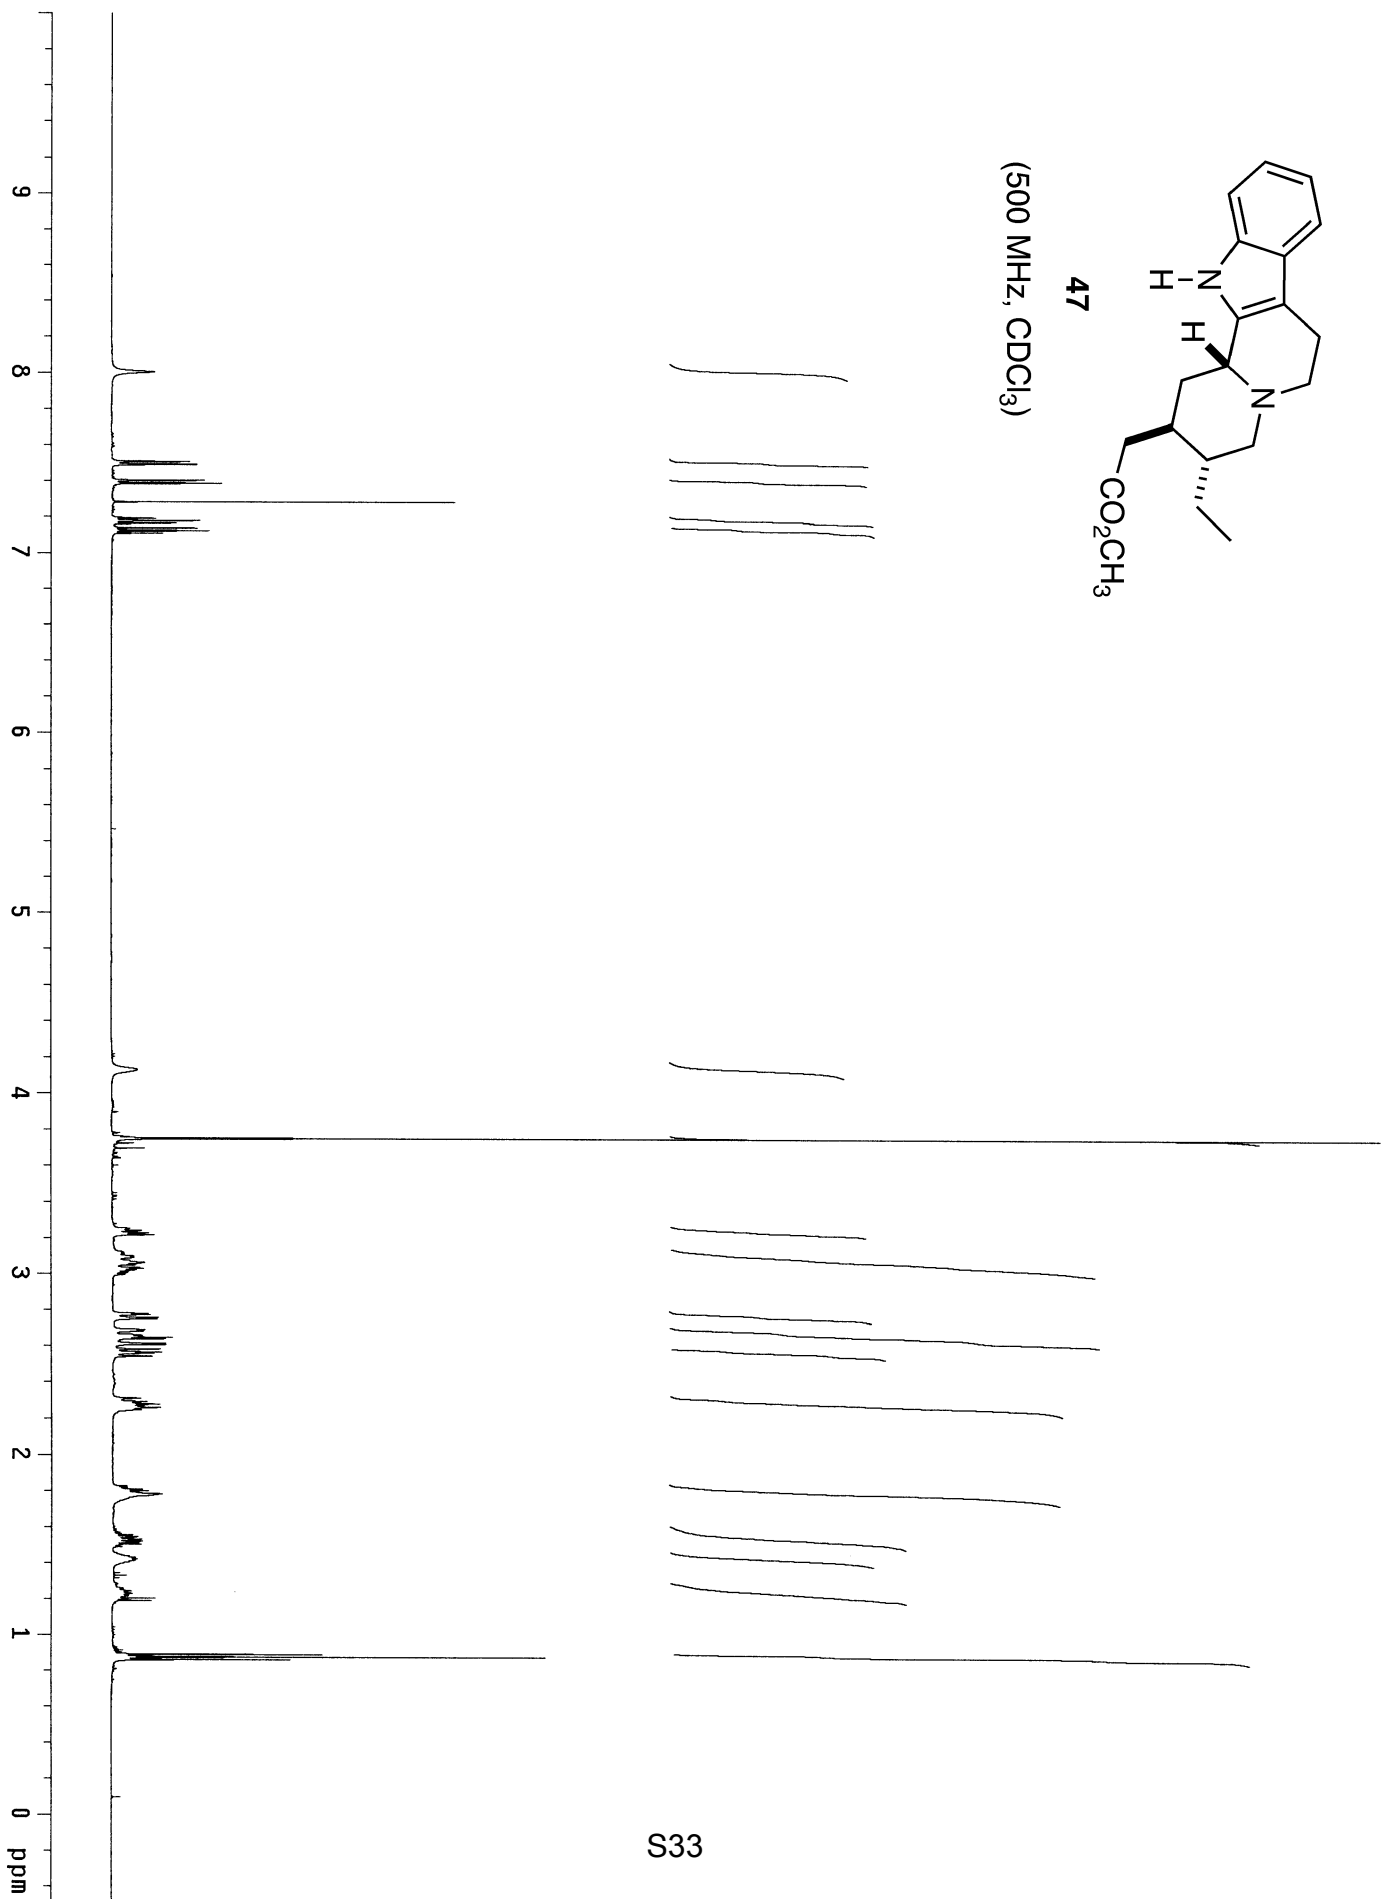

ORTEP of **26**

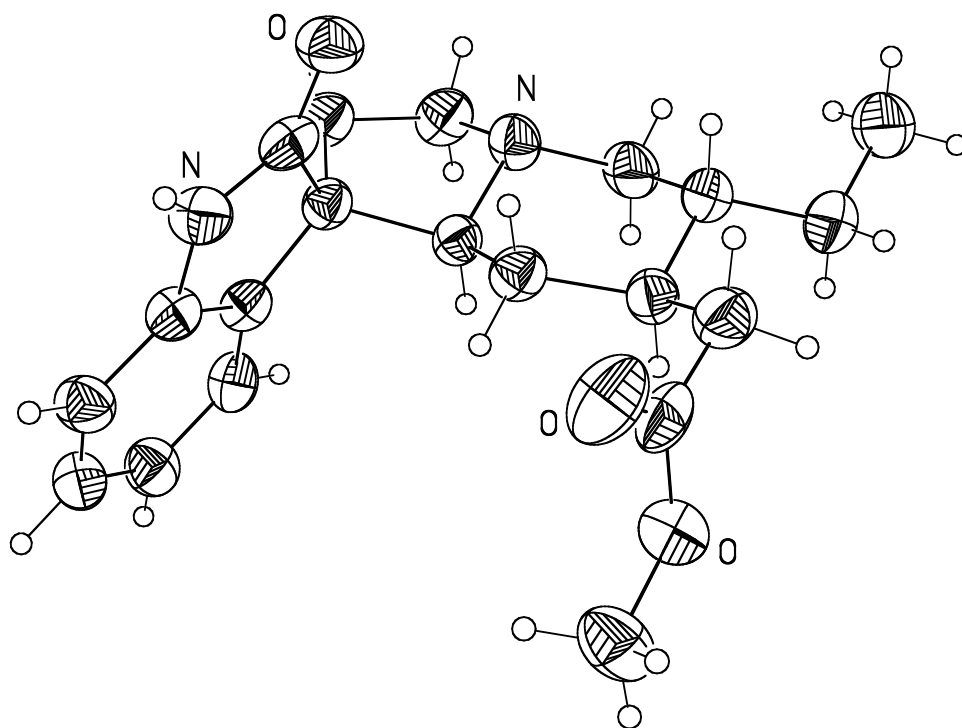

ORTEP of **44**

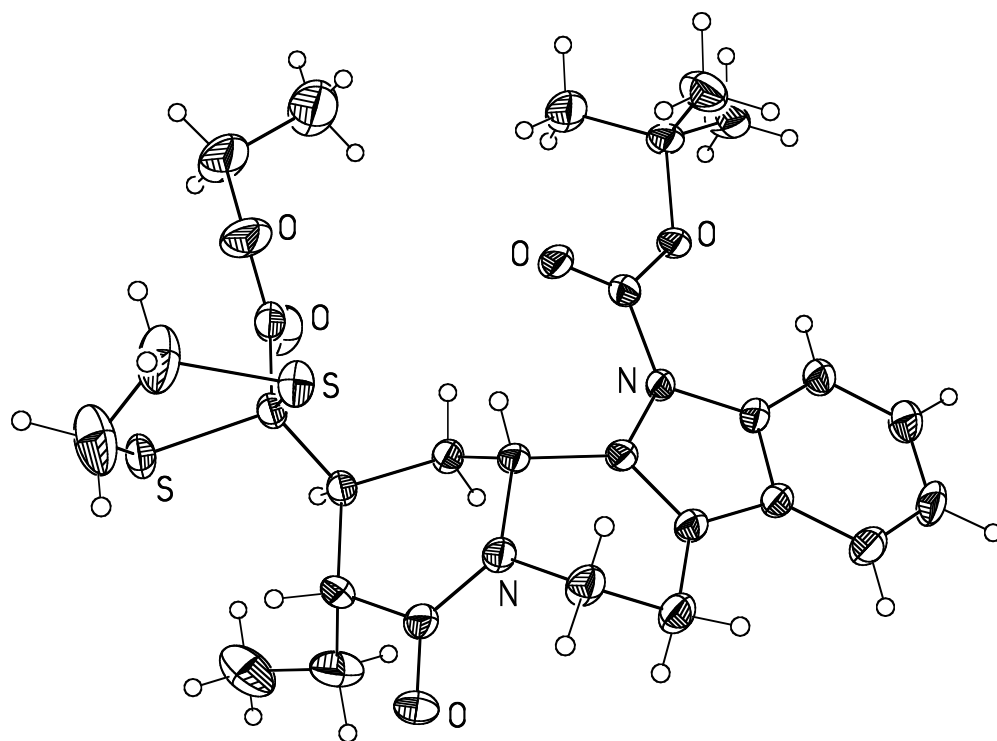

Supplement: Supplementary file 1 [file 4770214]
